# Supplementary material
Source: PubMed Central journal article supplement (PMC6731364)
Supplement: mmc1.pdf [file mmc1.pdf]

## Supplemental Data

### Aberrant Function of the C-Terminal Tail of HIST1H1E Accelerates Cellular Senescence and Causes Premature Aging

Elisabetta Flex, Simone Martinelli, Anke Van Dijck, Andrea Cioffi, Serena Cecchetti, Elisa Coluzzi, Luca Pannone, Cristina Andreoli, Francesca Clementina Radio, Simone Pizzi, Giovanna Carpentieri, Alessandro Bruselles, Giuseppina Catanzaro, Lucia Pedace, Evelina Miele, Elena Carcarino, Xiaoyan Ge, Chieko Chijiwa, M.E. Suzanne Lewis, Marije Meuwissen, Sandra Kenis, Nathalie Van der Aa, Austin Larson, Kathleen Brown, Melissa P. Wasserstein, Brian G. Skotko, Amber Begtrup, Richard Person, Maria Karayiorgou, J. Louw Roos, Koen L. Van Gassen, Marije Koopmans, Emilia K. Bijlsma, Gijs W.E. Santen, Daniela Q.C.M. Barge-Schaapveld, Claudia A.L. Ruivenkamp, Mariette J.V. Hoffer, Seema R. Lalani, Haley Streff, William J. Craigen, Brett H. Graham, Annette P.M. van den Elzen, Daan J. Kamphuis, Katrin Öunap, Karit Reinson, Sander Pajusalu, Monica H. Wojcik, Clara Viberti, Cornelia Di Gaetano, Enrico Bertini, Simona Petrucci, Alessandro De Luca, Rossella Rota, Elisabetta Ferretti, Giuseppe Matullo, Bruno Dallapiccola, Antonella Sgura, Magdalena Walkiewicz, R. Frank Kooy, and Marco Tartaglia

## SUPPLEMENTAL FIGURES

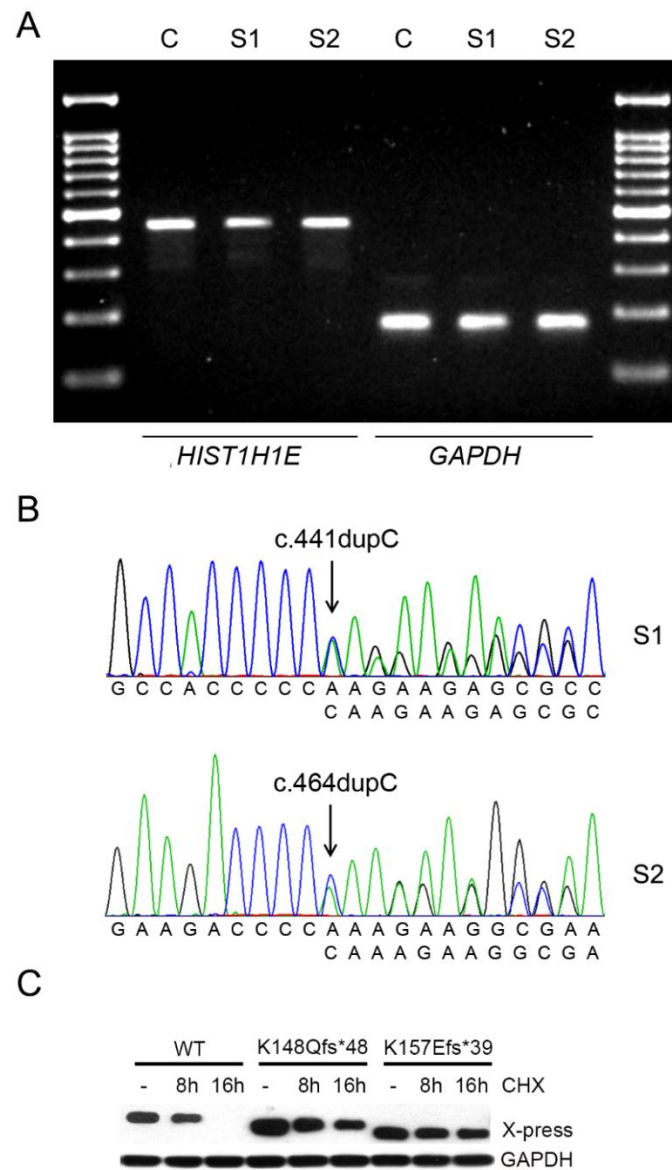

**Figure S1. Disease-causing *HIST1H1E* frameshift mutations do not affect RNA and protein stability.** (A) RT-PCR products obtained from total RNA from fibroblasts of affected subjects S1 and S2 show equal amount of *HIST1H1E* cDNA, indicating stability of the mutant transcripts, which is consistent with the notion that intronless genes generally evade nonsense-mediated RNA decay. GAPDH is reported as internal control documenting the same use of template cDNA. (B) Chromatograms showing the heterozygous state of the two studied mutations as assayed on cDNA obtained from total RNA of fibroblasts from affected subjects S1 and S2. (C) Protein stability was assessed in COS-1 cells transiently transfected with wild-type Xpress-tagged *HIST1H1E* and mutants carrying the c.441dupC (p.Lys148Glnfs\*48 [K148Qfs\*48]) and c.464dupC (p.Lys157Glnfs\*39 [K157Efs\*39]) mutations. After transfection (48 h), cells were treated with cycloheximide (CHX, 20  $\mu$ g/ml) for the indicated time or left untreated. Protein levels were assessed by immunoblotting, using an anti-Xpress monoclonal antibody. GAPDH levels are shown to document equal loading of total proteins from cell lysates. Western blot from a representative experiment of three performed is shown.

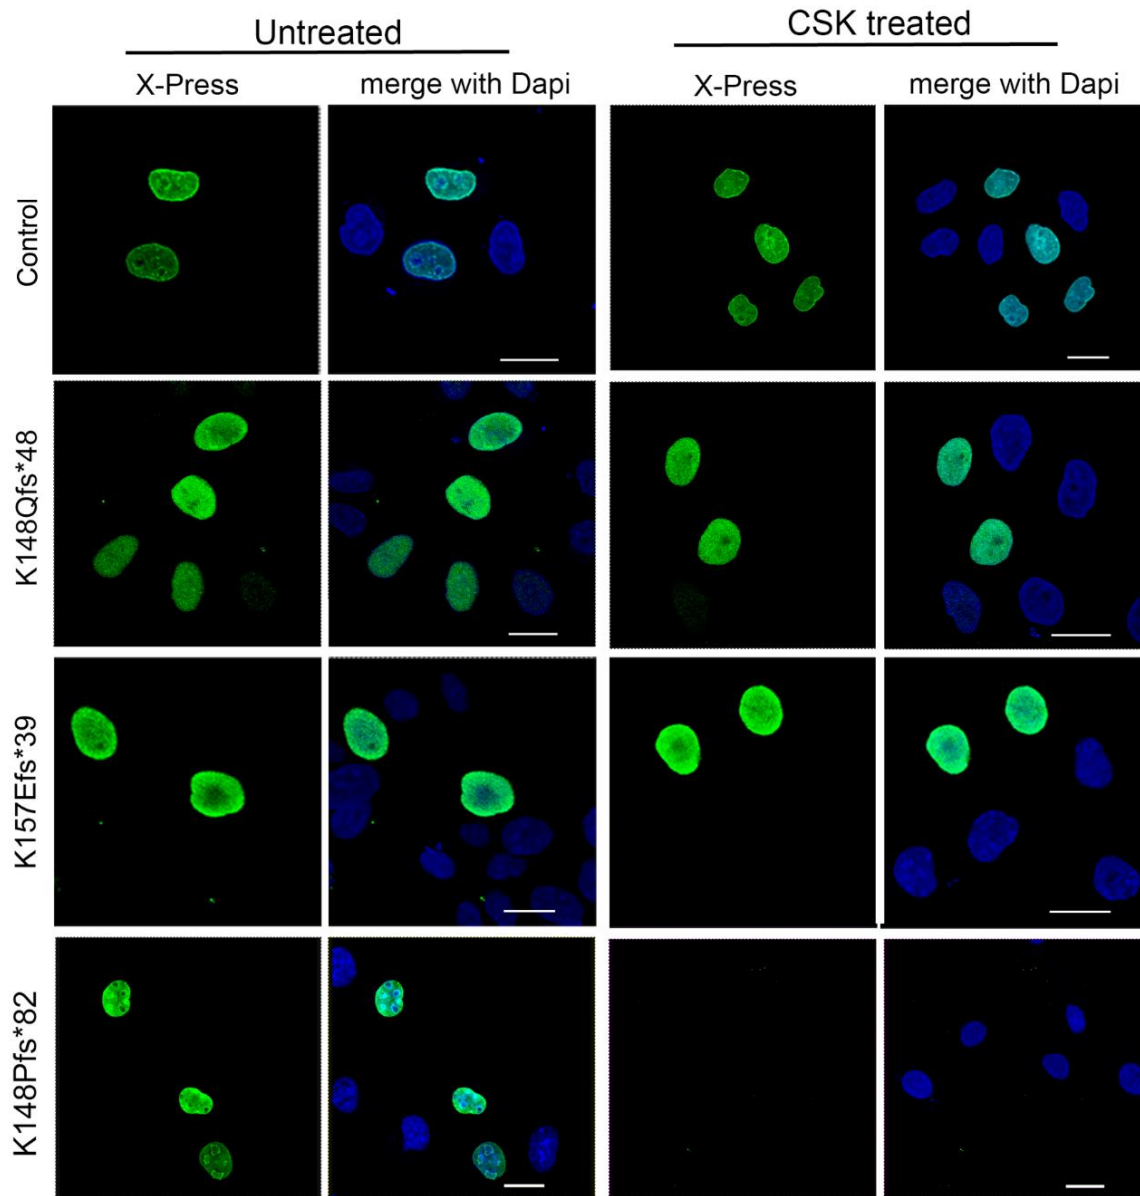

**Figure S2. Disease-causing HIST1H1E mutants display proper subcellular localization and stably bind to chromatin.** CLSM analyses were performed on HeLa cells transfected with vectors expressing Xpress-tagged wild-type HIST1H1E, two selected disease-causing mutants (p.Lys148Glnfs\*48 [K148Qfs\*48] and p.Lys157Glufs\*39 [K157Efs\*39]), and a HIST1H1E protein generated to express the third open reading frame at an equivalent position of the C-terminus (p.Lys148Profs\*82 [K148Pfs\*82]; not occurring in affected subjects). After 48 h from transfection, cells were treated with CSK (right) or left untreated (left), fixed, and stained (anti-Xpress antibody). Nuclei were stained with DAPI (blue). Images show that, similarly to the wild-type protein, the disease-causing HIST1H1E mutants stably bind to chromatin. By contrast, the mutant carrying the alternative open reading frame was characterized by compromised chromatin binding, as shown by its loss of nuclear localization after CSK treatment. Bars correspond to 20  $\mu$ m. Images are representative of > 200 analyzed cells.

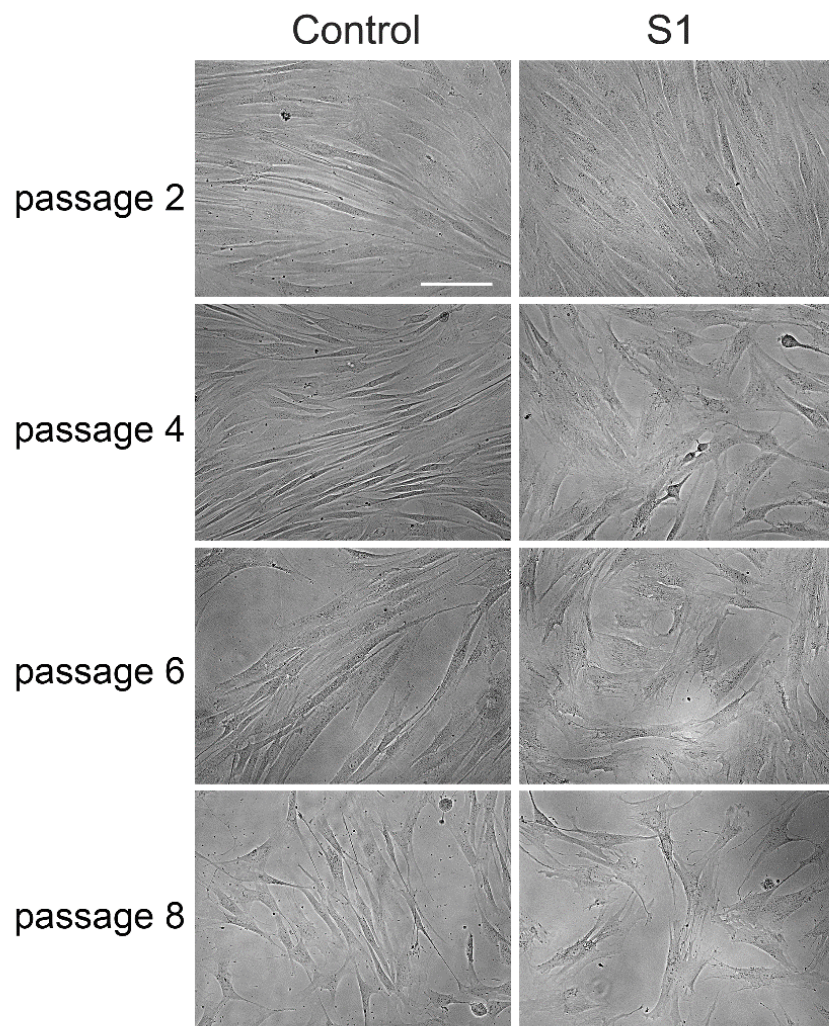

**Figure S3. Accelerated cellular senescence in fibroblasts from affected subject S1.** Images show morphological changes in cells endogenously expressing the heterozygous c.441dupC frameshift (p.Lys148Glnfs\*48) in *HIST1H1E*. Morphology of cells rapidly progress from a thin and spindle shape to a large, flattened and irregular shape, which is visible since early passages. Photographs are at the same magnification (75  $\mu$ m).

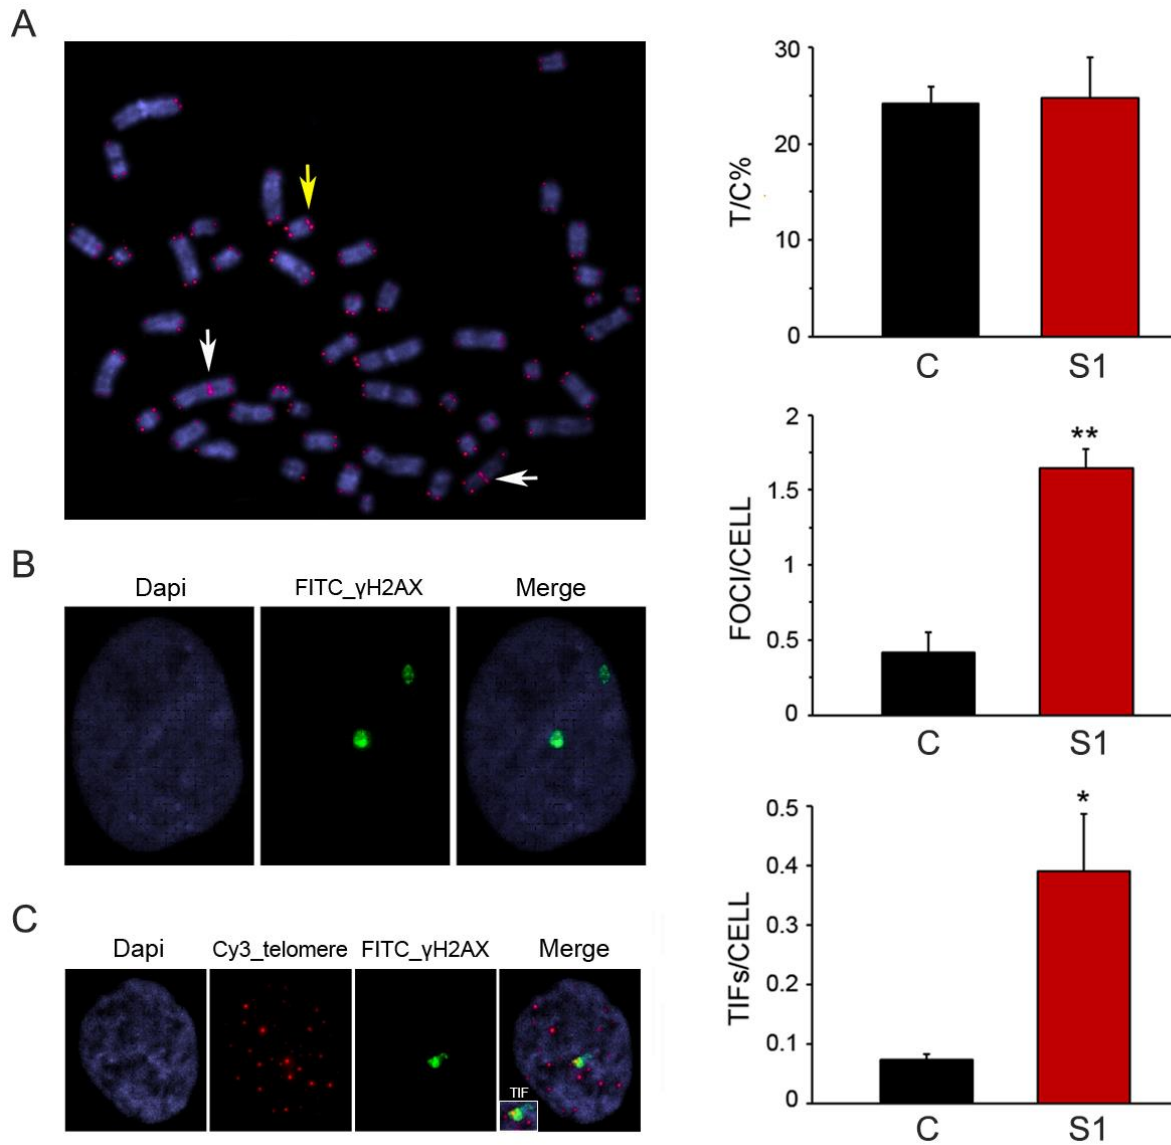

**Figure S4. Telomere status and DNA damage sensitivity in fibroblasts from affected subject S1.** (A) Q-FISH analysis. Representative image of a metaphase staining by Q-FISH (left). The yellow and white arrows indicate the telomeric signal and centromeres of chromosomes 2, respectively, which are used as internal reference in each metaphase. The telomere length was measured as the ratio between total telomeres fluorescence (T) and fluorescence of centromeres of chromosomes 2. The graph (mean  $\pm$  SEM) shows no differences between control and S1 samples ( $p < 0.05$ , Mann-Whitney U test) (right). (B) Representative image of nuclei (DAPI) positive for  $\gamma$ H2AX (green), a marker of DSBs (left). The graph shows the frequency of  $\gamma$ H2AX foci per cell (mean  $\pm$  SEM) (right). A significant increase in the frequency of foci was observed in S1 cells with respect to control cells (\*\* $p < 0.001$ ; two-tailed Student's t-test). (C) Representative image of nuclei (DAPI) stained for  $\gamma$ H2AX (green) and Cy3 (telomere-specific probe, red) (left). A magnification of telomere- $\gamma$ H2AX co-localisation (telomere dysfunction-induced foci, TIF) is also shown. The graph (mean  $\pm$  SEM) shows the frequency of TIFs per cell (right), which occur with higher frequency in cells from subject S1 ( $*p < 0.05$ ).

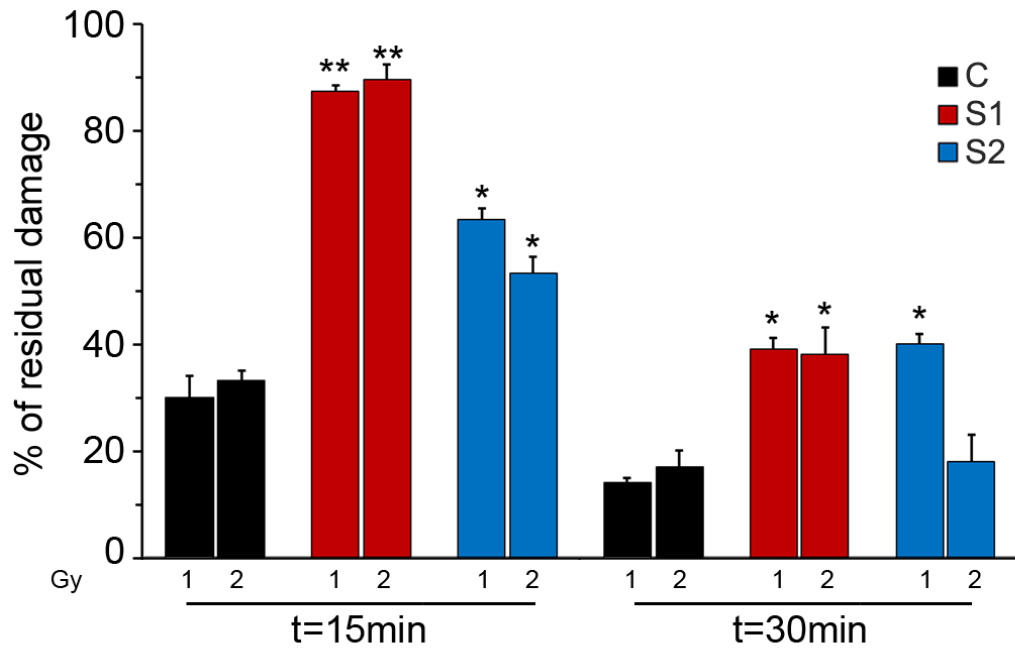

**Figure S5. Defective HIST1H1E function is associated with defective/delayed DNA repair.** DNA damage was induced by 1 or 2 Gy  $\gamma$ -ray irradiation. Following treatment, cells were incubated at 37 °C for 15 or 30 min to allow DNA repair. The percentage of residual DNA damage was calculated as follows: [(tail moment at time t after irradiation – basal tail moment)/(tail moment at t=0 – basal tail moment)  $\times$  100]. A lower/delayed capability to repair single/double strand breaks was observed in fibroblasts from affected subjects S1 and S2 compared to control cells (\* $p$  < 0.02, \*\* $p$  < 0.001; two-tailed Student's t-test). For each experimental point, at least 75 cells were analyzed. Values are mean  $\pm$  SEM of three independent experiments.

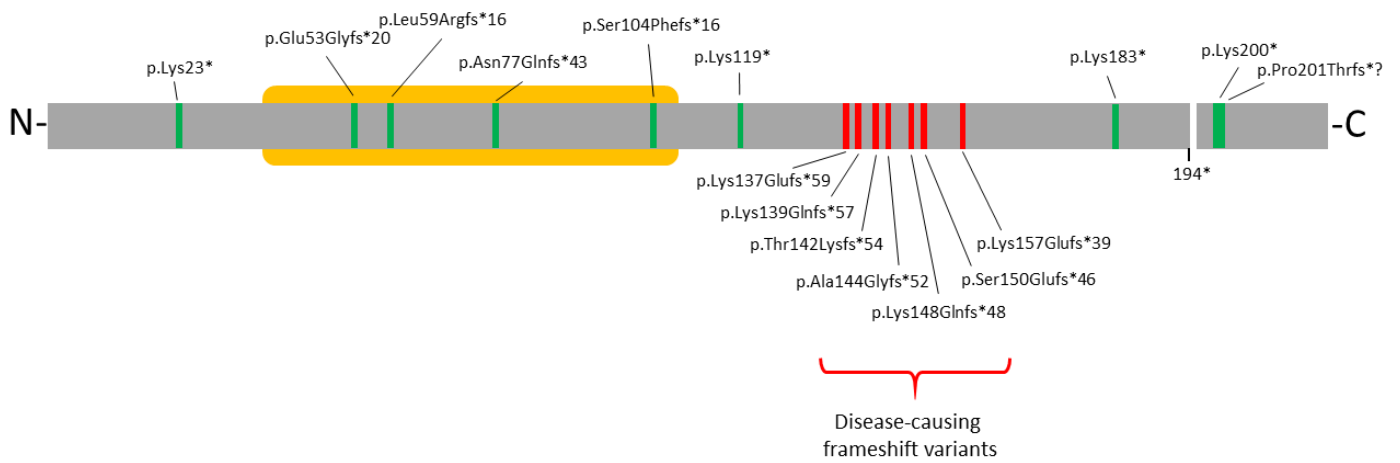

**Figure S6. Truncating variants in *HIST1H1E*.** Schematic diagram representing the *HIST1H1E* structure, and the position of the disease-causing frameshift mutations identified in this and previous studies (below the cartoon, red) and those reported in gnomAD (above the cartoon, green). The globular domain is shown in yellow. All disease-causing mutations result in a shorter protein with an identical divergent C-terminal tail (the new stop codon is shown below the cartoon, 194\*). Differently, truncating mutations annotated in gnomAD either affect regions of the protein much more proximal to the N-terminus (the majority clustering within the globular domain) or are close to the C-terminus, downstream the regulatory serine/threonine residues. While the former are predicted to result in highly unstable proteins that likely undergo accelerated degradation and/or proteins unable to bind chromatin, the latter are expected to be loss-of-function mutants or behave as the wild-type protein, but are not expected to have a dominant negative effect.

## SUPPLEMENTAL TABLES

**Table S1.** Predicted amino acid sequence of disease-causing frameshifts affecting the C-terminal region of HIST1H1E.

| AA Change                                                              | AA Length | AA Sequence                                                                                                                                                                                                                                       |
|------------------------------------------------------------------------|-----------|---------------------------------------------------------------------------------------------------------------------------------------------------------------------------------------------------------------------------------------------------|
| Ref. Seq.<br>(NP_005312.1)                                             | 219       | MSETAAPAAPAPAEKTPVKKKARKSAGAAKRKASGPPVSELITKAVAASKERSGVSLAALKKALAAAGYDVEKNNSRIKLGKSLVSKGTLVQTKGTGASGSFKLNKKA<br>ASGEAKPKAKKAGAAKAKKPAGAAKPKKATGAATPKKSAKTPKKAKKPAAGAAKAKSPKKAKAAKPKKAPKSPAKAKAVKPKAAKPKTAKPKAAKPKKAAAKK*                          |
| p.Lys137Glufs*59<br>(S12)                                              | 194       | MSETAAPAAPAPAEKTPVKKKARKSAGAAKRKASGPPVSELITKAVAASKERSGVSLAALKKALAAAGYDVEKNNSRIKLGKSLVSKGTLVQTKGTGASGSFKLNKKA<br>ASGEAKPKAKKAGAAKAKKPAGAAK <u>EAQEGDGGGHPQEERQEDPKEGEEAGCSCWSQKSEKPEKGESSQAKKGAQEPSEGQSS*</u>                                      |
| p.Lys139Glufs*57<br>(S4, S6)                                           | 194       | MSETAAPAAPAPAEKTPVKKKARKSAGAAKRKASGPPVSELITKAVAASKERSGVSLAALKKALAAAGYDVEKNNSRIKLGKSLVSKGTLVQTKGTGASGSFKLNKKA<br>ASGEAKPKAKKAGAAKAKKPAGAAK <u>QEGDGGGHPQEERQEDPKEGEEAGCSCWSQKSEKPEKGESSQAKKGAQEPSEGQSS*</u>                                        |
| p.Thr142Lysfs*54<br>(S3, S9)                                           | 194       | MSETAAPAAPAPAEKTPVKKKARKSAGAAKRKASGPPVSELITKAVAASKERSGVSLAALKKALAAAGYDVEKNNSRIKLGKSLVSKGTLVQTKGTGASGSFKLNKKA<br>ASGEAKPKAKKAGAAKAKKPAGAAKPKKA <u>KGVGHPQEERQEDPKEGEEAGCSCWSQKSEKPEKGESSQAKKGAQEPSEGQSS*</u>                                       |
| p.Ala144Glyfs*52<br>(S8, S13, S16, S20)                                | 194       | MSETAAPAAPAPAEKTPVKKKARKSAGAAKRKASGPPVSELITKAVAASKERSGVSLAALKKALAAAGYDVEKNNSRIKLGKSLVSKGTLVQTKGTGASGSFKLNKKA<br>ASGEAKPKAKKAGAAKAKKPAGAAKPKKATGG <u>GHPQEERQEDPKEGEEAGCSCWSQKSEKPEKGESSQAKKGAQEPSEGQSS*</u>                                       |
| p.Ala145Glyfs*51<br>(S15)                                              | 194       | MSETAAPAAPAPAEKTPVKKKARKSAGAAKRKASGPPVSELITKAVAASKERSGVSLAALKKALAAAGYDVEKNNSRIKLGKSLVSKGTLVQTKGTGASGSFKLNKKA<br>ASGEAKPKAKKAGAAKAKKPAGAAKPKKATGA <u>GHPQEERQEDPKEGEEAGCSCWSQKSEKPEKGESSQAKKGAQEPSEGQSS*</u>                                       |
| p.Thr146Hisfs*50<br>(S14)                                              | 194       | MSETAAPAAPAPAEKTPVKKKARKSAGAAKRKASGPPVSELITKAVAASKERSGVSLAALKKALAAAGYDVEKNNSRIKLGKSLVSKGTLVQTKGTGASGSFKLNKKA<br>ASGEAKPKAKKAGAAKAKKPAGAAKPKKATGAA <u>HPQEERQEDPKEGEEAGCSCWSQKSEKPEKGESSQAKKGAQEPSEGQSS*</u>                                       |
| p.Thr146Aspfs*42<br>(S19)                                              | 186       | MSETAAPAAPAPAEKTPVKKKARKSAGAAKRKASGPPVSELITKAVAASKERSGVSLAALKKALAAAGYDVEKNNSRIKLGKSLVSKGTLVQTKGTGASGSFKLNKKA<br>ASGEAKPKAKKAGAAKAKKPAGAAKPKKATGAA <u>DPKEGEEAGCSCWSQKSEKPEKGESSQAKKGAQEPSEGQSS*</u>                                               |
| p.Lys148Glufs*48<br>(S1, S5, S10, S11, S17, S18)                       | 194       | MSETAAPAAPAPAEKTPVKKKARKSAGAAKRKASGPPVSELITKAVAASKERSGVSLAALKKALAAAGYDVEKNNSRIKLGKSLVSKGTLVQTKGTGASGSFKLNKKA<br>ASGEAKPKAKKAGAAKAKKPAGAAKPKKATGAATP <u>QEERQEDPKEGEEAGCSCWSQKSEKPEKGESSQAKKGAQEPSEGQSS*</u>                                       |
| p.Ser150Glufs*46<br>(S7)                                               | 194       | MSETAAPAAPAPAEKTPVKKKARKSAGAAKRKASGPPVSELITKAVAASKERSGVSLAALKKALAAAGYDVEKNNSRIKLGKSLVSKGTLVQTKGTGASGSFKLNKKA<br>ASGEAKPKAKKAGAAKAKKPAGAAKPKKATGAATPKK <u>ERQEDPKEGEEAGCSCWSQKSEKPEKGESSQAKKGAQEPSEGQSS*</u>                                       |
| p.Lys157Glufs*39<br>(S2)                                               | 194       | MSETAAPAAPAPAEKTPVKKKARKSAGAAKRKASGPPVSELITKAVAASKERSGVSLAALKKALAAAGYDVEKNNSRIKLGKSLVSKGTLVQTKGTGASGSFKLNKKA<br>ASGEAKPKAKKAGAAKAKKPAGAAKPKKATGAATPKKSAKTPK <u>EGEEAGCSCWSQKSEKPEKGESSQAKKGAQEPSEGQSS*</u>                                        |
| p.Lys148Profs*82 (frameshift<br>not occurring in affected<br>subjects) | 228       | MSETAAPAAPAPAEKTPVKKKARKSAGAAKRKASGPPVSELITKAVAASKERSGVSLAALKKALAAAGYDVEKNNSRIKLGKSLVSKGTLVQTKGTGASGSFKLNKKA<br>ASGEAKPKAKKAGAAKAKKPAGAAKPKKATGAATP <u>PRRAPRRPQRRRRSLQLLEPKKRKARKRRKQPSQKRRPRAQRRPKQLNPRRLNQRPPSPRQPSQRRRQPRK<br/>SRKFLWPTA*</u> |



**Table S2.** Clinical features of the affected subjects with frameshift *HIST1H1E* mutations.

|                                                                              | Subject 1        | Subject 2                | Subject 3                                                                                      | Subject 4                                                                                            | Subject 5                                              | Subject 6                                       |
|------------------------------------------------------------------------------|------------------|--------------------------|------------------------------------------------------------------------------------------------|------------------------------------------------------------------------------------------------------|--------------------------------------------------------|-------------------------------------------------|
| <i>Previously reported</i>                                                   | -                | -                        | -                                                                                              | -                                                                                                    | -                                                      | -                                               |
| <b>Mutation</b>                                                              |                  |                          |                                                                                                |                                                                                                      |                                                        |                                                 |
| cDNA (NM_005321.2)                                                           | c.441dupC        | c.464dupC                | c.425_431delinsAGGG<br>GGTT                                                                    | c.414dupC                                                                                            | c.441dupC                                              | c.414dupC                                       |
| Protein change<br>( <a href="http://www.mutalyzer.nl">www.mutalyzer.nl</a> ) | p.Lys148Glnfs*48 | p.Lys157Glnfs*39         | p.Thr142Lysfs*54                                                                               | p.Lys139Glnfs*57                                                                                     | p.Lys148Glnfs*48                                       | p.Lys139Glnfs*57                                |
| De novo inheritance                                                          | +                | +                        | +                                                                                              | +                                                                                                    | +                                                      | U                                               |
| <b>Epidemiology</b>                                                          |                  |                          |                                                                                                |                                                                                                      |                                                        |                                                 |
| Origin                                                                       | caucasian        | caucasian                | caucasian                                                                                      | caucasian                                                                                            | caucasian                                              | african american                                |
| Gender                                                                       | male             | female                   | male                                                                                           | female                                                                                               | female                                                 | female                                          |
| Age (years) at last observation                                              | 49y              | 4y 6m                    | 30y 9m                                                                                         | 14m                                                                                                  | 12y                                                    | 3y                                              |
| Duration gestation (weeks)                                                   | U                | 40w                      | 38w                                                                                            | 38w                                                                                                  | 41w                                                    | 39w                                             |
| Pregnancy                                                                    | uneventful       | late hyperemesis         | decreased fetal movement                                                                       | wide ventricles seen on ultrasound                                                                   | uneventful, amniocentesis was performed                | uneventful                                      |
| Neonatal problems                                                            | U                | -                        | fetal heart decelerations. Apgar 4 and 6, cyanosis at birth, intubation for ventilation (NICU) | primary cesarean (1st pregnancy breech position)                                                     | -                                                      | congenital hypotonia, feeding difficulties, FTT |
| Birth Weight, g (SD)                                                         | U                | 3714g (+0.73SD)          | 3713.8g (+0.4SD)                                                                               | 4470g (+2.75SD)                                                                                      | 3150g (-0.41SD)                                        | 3573g (+0.45SD)                                 |
| Birth Length, cm (SD)                                                        | U                | 53.3cm (+1.8SD)          | 52.1cm (+1SD)                                                                                  | U                                                                                                    | 49.5cm (-0.2SD)                                        | 53.3 cm (+1.8SD)                                |
| Birth OFC, cm (SD)                                                           | U                | U                        | 35 cm (+0.1 SD)                                                                                | U                                                                                                    | 33cm (-1.32SD)                                         | 35 cm (+0.1SD)                                  |
| Weight at last observation, kg (SD)                                          | U                | 21 kg (+1.93SD)          | 59 kg (+0.09SD)                                                                                | 10.3 kg (+1.54SD)                                                                                    | 41.6 kg (-0.02SD)                                      | 14.1 kg (0.14SD)                                |
| Height at last observation, cm (SD)                                          | U                | 111 cm (+1.83SD)         | 167.2 cm (+0.62SD)                                                                             | 74 cm (+0.56SD)                                                                                      | 146.2 cm (-0.74SD)                                     | 91.4 cm (-0.96SD)                               |
| OFC at last observation, cm (SD)                                             | U                | 53.8 cm (+2.1SD)         | 60cm (+3.4SD)                                                                                  | 50 cm (+3.48SD)                                                                                      | 54.9 cm (+1.14SD) (+2SD at age 4, while length -0.5SD) | 49.2 cm (-0.07SD)                               |
| <b>Growth</b>                                                                |                  |                          |                                                                                                |                                                                                                      |                                                        |                                                 |
| Delay/ ID : mild=1; moderate=2; severe=3, unspecified                        | 2                | 1                        | 1                                                                                              | 0                                                                                                    | 1                                                      | 2                                               |
| Sitting unsupported (months)                                                 | U                | 10                       | 8                                                                                              | 8.5                                                                                                  | 12                                                     | 6                                               |
| Walking independently (months)                                               | U                | 16                       | 24                                                                                             | not yet at age 14m, but makes steps holding table since age 1 year seems late but still within range | 30                                                     | 24                                              |
| Motor delay                                                                  | +                | +                        | +                                                                                              | U                                                                                                    | +                                                      | +                                               |
| Speech delay                                                                 | +                | +                        | +                                                                                              | U                                                                                                    | +                                                      | +                                               |
| Hypotonia                                                                    | U                | -                        | +                                                                                              | +                                                                                                    | -                                                      | +                                               |
| Seizures, type and treatment                                                 | U                | childhood focal seizures | febrile seizures                                                                               | -                                                                                                    | -                                                      | -                                               |
| Hearing loss                                                                 | +                | -                        | +                                                                                              | -                                                                                                    | -                                                      | +                                               |
| Frequent otitis media                                                        | U                | -                        | +                                                                                              | -                                                                                                    | -                                                      | +                                               |
| <b>Eye defects</b>                                                           | U                | U                        | +                                                                                              | -                                                                                                    | +                                                      | +                                               |
| Hypermetropia (H)/ myopia (M)                                                | U                | -                        | M                                                                                              | -                                                                                                    | H                                                      | -                                               |
| Astigmatism                                                                  | U                | -                        | -                                                                                              | -                                                                                                    | +                                                      | + - simple hyperopic                            |
| Strabismus                                                                   | U                | -                        | +                                                                                              | -                                                                                                    | +                                                      | -                                               |

|                                                       | Subject 1                                                        | Subject 2                           | Subject 3                                                                                                                                      | Subject 4             | Subject 5                                                                                          | Subject 6 |
|-------------------------------------------------------|------------------------------------------------------------------|-------------------------------------|------------------------------------------------------------------------------------------------------------------------------------------------|-----------------------|----------------------------------------------------------------------------------------------------|-----------|
| <b>Craniofacial features</b>                          |                                                                  |                                     |                                                                                                                                                |                       |                                                                                                    |           |
| Coarse face                                           | U                                                                | -                                   | -                                                                                                                                              | -                     | -                                                                                                  | -         |
| High hairline                                         | +                                                                | +                                   | +                                                                                                                                              | +                     | +                                                                                                  | +         |
| Abnormal hair                                         | sparse hair, generalized hypopigmentation of hair, hypotrichosis | frontal upsweep, thin, sparse hair  | alopecia totalis (sparse frontotemporal hair) and sparse eyelashes since age 10y; delayed hair growth as child; no eyebrows until about age 4. | sparse hair           | thin hair, Widow's peak (like father)                                                              | -         |
| Prominent forehead                                    | +                                                                | +                                   | +                                                                                                                                              | +                     | +                                                                                                  | +         |
| Bitemporal narrowing                                  | +                                                                | U                                   | +                                                                                                                                              | +                     | U                                                                                                  | U         |
| Epicanthus/telecanthus                                | epicanthus                                                       | U                                   | U                                                                                                                                              | U                     | U                                                                                                  | U         |
| Downward slant palpebral fissures                     | U (small)                                                        | +                                   | +                                                                                                                                              | - (narrow)            | +                                                                                                  | +         |
| Deepset eyes                                          | U                                                                | U                                   | +                                                                                                                                              | U                     | U                                                                                                  | U         |
| Ptosis                                                | +                                                                | -                                   | +                                                                                                                                              | -                     | -                                                                                                  | -         |
| Hypertelorism                                         | +                                                                | -                                   | U                                                                                                                                              | +                     | +++                                                                                                | +         |
| Small/pointed chin                                    | U                                                                | +                                   | +                                                                                                                                              | +                     | -                                                                                                  | -         |
| Nasal bridge anomalies                                | narrow nasal bridge                                              | wide, low and flat                  | U                                                                                                                                              | wide                  | -                                                                                                  | wide      |
| Upturned nasal tip                                    | U                                                                | +                                   | -                                                                                                                                              | -                     | -                                                                                                  | -         |
| Full nasal tip                                        | U                                                                | +                                   | +                                                                                                                                              | +                     | -                                                                                                  | +         |
| Thick alae nasi                                       | U                                                                | +                                   | +                                                                                                                                              | +                     | -                                                                                                  | +         |
| Short nose                                            | U                                                                | -                                   | -                                                                                                                                              | -                     | -                                                                                                  | -         |
| Prominent cheek bones                                 | U                                                                | U                                   | +                                                                                                                                              | U                     | U                                                                                                  | U         |
| Smooth philtrum                                       | U                                                                | +                                   | U                                                                                                                                              | -                     | -                                                                                                  | -         |
| Broad philtrum                                        | U                                                                | -                                   | U                                                                                                                                              | -                     | -                                                                                                  | -         |
| Long philtrum                                         | U                                                                | +                                   | U                                                                                                                                              | -                     | -                                                                                                  | +         |
| Mouth abnormalities                                   | U                                                                | thin upper vermillion               | U                                                                                                                                              | thin upper vermillion | accentuated Cupid's bow, high palate                                                               | -         |
| Micrognathia                                          | +                                                                | U                                   | +                                                                                                                                              | U                     | U                                                                                                  | U         |
| Widely spaced teeth                                   | U                                                                | -                                   | U                                                                                                                                              | U                     | widely spaced central incisors                                                                     | U         |
| Enlarged tongue                                       | U                                                                | U                                   | +                                                                                                                                              | -                     | U                                                                                                  | U         |
| Ear abnormalities                                     | low set                                                          | thickening of superior scaphoelices | low set, upturned ear lobes                                                                                                                    | -                     | low set, simple helix, upturned ear lobes                                                          | -         |
| Hand abnormalities                                    | brachydactyly, broad thumbs, deep palmar crease                  | -                                   | bilaterally brachydactyly (shortening of distal phalangeal area), unilateral palmar crease                                                     | -                     | tapering fingers, slightly shorter 4th metacarpals. Camptodactyly. Palmar erythema, low-set thumbs | -         |
| Joint hyperlaxity/stiffness                           | U                                                                | -                                   | U                                                                                                                                              | U                     | very stiff fingers                                                                                 | -         |
| <b>Nail anomalies</b>                                 | nail dysplasia                                                   | -                                   | middle ridges on his two thumbnails                                                                                                            | -                     | thin and short nails                                                                               | -         |
| <b>Feet abnormalities (flat feet, sandal gap,...)</b> | U                                                                | -                                   | orthopedic insoles, flat feet                                                                                                                  | -                     | orthopedic insoles, stiff feet, plantar erythema                                                   | -         |
| <b>Toe abnormalities</b>                              | broad hallux, deviation of hallux                                | broad toes                          | U                                                                                                                                              | -                     | long halluces                                                                                      | -         |
| <b>RX abnormalities</b>                               | U                                                                | -                                   | -                                                                                                                                              | U                     | osteopenia, advanced bone age, multiple small stress fractures                                     | -         |
| <b>Other limb abnormalities</b>                       | U                                                                | -                                   | U                                                                                                                                              | -                     | lower limb pitting edema, genua valga, slight leg length difference                                | -         |

|                                                                                 | Subject 1                                                                                                                | Subject 2                                                           | Subject 3                                                                                                                                              | Subject 4                                               | Subject 5                                                           | Subject 6                        |
|---------------------------------------------------------------------------------|--------------------------------------------------------------------------------------------------------------------------|---------------------------------------------------------------------|--------------------------------------------------------------------------------------------------------------------------------------------------------|---------------------------------------------------------|---------------------------------------------------------------------|----------------------------------|
| <b>Other</b>                                                                    |                                                                                                                          |                                                                     |                                                                                                                                                        |                                                         |                                                                     |                                  |
| Skull abnormalities                                                             | dolichocephaly (scaphocephaly), abnormal skull ossification                                                              | dolichocephaly                                                      | macrocephaly                                                                                                                                           | mild turricephaly                                       | scaphocephaly                                                       | -                                |
| Cryptorchidism                                                                  | U                                                                                                                        | -                                                                   | unilateral                                                                                                                                             | -                                                       | -                                                                   | -                                |
| Renal abnormalities                                                             | U                                                                                                                        | U                                                                   | kidney cysts bilaterally                                                                                                                               | U                                                       | U                                                                   | U                                |
| Skin                                                                            | multiple nevi, skin hyperpigmentation, cutis laxa                                                                        | 1 hypopigmented lesion on the left knee                             | cutis marmorata when young.                                                                                                                            | -                                                       | mild cutis marmorata, dry skin, multiple lentiginos solaris in face | -                                |
| Scoliosis (mild, severe)                                                        | U                                                                                                                        | -                                                                   | U                                                                                                                                                      | -                                                       | mild                                                                | mild                             |
| Widely spaced/inverted nipples                                                  | U                                                                                                                        | -                                                                   | U                                                                                                                                                      | -                                                       | +                                                                   | -                                |
| Cardiac abnormalities                                                           | -                                                                                                                        | -                                                                   | -                                                                                                                                                      | small 'atrial septum defect                             | -                                                                   | -                                |
| Pectus excavatum/carinatum                                                      | excavatum, scapular wings                                                                                                | -                                                                   | U                                                                                                                                                      | -                                                       | excavatum                                                           | -                                |
| dentition (normal; pointed; delayed prim / delayed permanent/missing permanent) | U                                                                                                                        | early loss of primary teeth/delayed permanent teeth                 | small, poorly enameled teeth                                                                                                                           | pointed teeth                                           | small, pointed teeth, some permanent teeth missing, short roots     | U                                |
| sleep problems                                                                  | U                                                                                                                        | + (restless sleeper and early awake)                                | U                                                                                                                                                      | -                                                       | '+ (frequently awake during night, early awake)                     | -                                |
| Laboratory abnormalities                                                        | pancytopenia (possible autoimmune origin), autoimmune disorder (systemic lupus erythematosus), congenital hypothyroidism | mildly elevated creatine (age 2 1/2)                                | low hemoglobin (iron supplementation ongoing)                                                                                                          | -                                                       | Hypophosphatasia (zinc deficiency)                                  | -                                |
| <b>Neuroradiology</b>                                                           |                                                                                                                          |                                                                     |                                                                                                                                                        | cerebral ultrasound at 6m: mild ventricular enlargement |                                                                     |                                  |
| MRI brain (at age in months)                                                    | -                                                                                                                        | approx 2y 6m                                                        | CT scan at 4 m of age and 6 y normal                                                                                                                   | -                                                       | U                                                                   | 9m                               |
| MRI brain abnormality                                                           | U                                                                                                                        | mild ventricular enlargement                                        | U                                                                                                                                                      | U                                                       | -                                                                   | mild inferior vermian hypoplasia |
| <b>Autism/Behavioral problems</b>                                               | abnormal behavior, psychotic episodes                                                                                    | autism spectrum disorder                                            | U                                                                                                                                                      | U                                                       | diminished eye contact in childhood and socialization anomalies     | -                                |
| Clinical diagnosis/tested for:                                                  | U                                                                                                                        | Clinical suspicion of Sotos syndrome NSD1 on WES normal, CMA normal | Clinical suspicion of Sotos syndrome NSD1 gene normal. FXS, Pallister-Killian syndrome, Prader Willi syndrome, Smith Magenis syndrome screening normal | SNP array normal; WES panel overgrowth syndromes        | Clinical suspicion of Sotos syndrome NSD1 gene normal               | U                                |

|                                                                           | Subject 7                                       | Subject 8          | Subject 9         | Subject 10                                    | Subject 11                                                                            | Subject 12                                 | Subject 13                                            |
|---------------------------------------------------------------------------|-------------------------------------------------|--------------------|-------------------|-----------------------------------------------|---------------------------------------------------------------------------------------|--------------------------------------------|-------------------------------------------------------|
| Previously reported Mutation                                              | -                                               | -                  | -                 | -                                             | -                                                                                     | -                                          | -                                                     |
| cDNA (NM_005321.2)                                                        | c.447dupG                                       | c.430dupG          | c.425delinsAG     | c.441dupC                                     | c.441dupC                                                                             | c.408dupG                                  | c.430dupG                                             |
| Protein change ( <a href="http://www.mutalyzer.nl">www.mutalyzer.nl</a> ) | p.Ser150Glufs*46                                | p.Ala144Glyfs*52   | p.Thr142Lysfs*54  | p.Lys148Glnfs*48                              | p.Lys148Glnfs*48                                                                      | p.Lys137Glufs*59                           | p.A144Gfs*53                                          |
| De novo inheritance                                                       | +                                               | U                  | U                 | +                                             | +                                                                                     | +                                          | +                                                     |
| <b>Epidemiology</b>                                                       |                                                 |                    |                   |                                               |                                                                                       |                                            |                                                       |
| Origin                                                                    | caucasian                                       | asian              | caucasian         | caucasian                                     | caucasian                                                                             | caucasian                                  | caucasian                                             |
| Gender                                                                    | male                                            | male               | female            | male                                          | female                                                                                | male                                       | female                                                |
| Age (years) at last observation                                           | 11y 11m                                         | 4y 9m              | 2y                | 1y 7m                                         | 6y                                                                                    | 4y                                         | 17m                                                   |
| Duration gestation (weeks)                                                | 34w                                             | at term            | at term           | 39w                                           | 40+2w                                                                                 | 39w                                        | 39w                                                   |
| Pregnancy                                                                 | ultrasound diagnosis of macrocephaly (32 weeks) | U                  | U                 | uneventful                                    | uneventful                                                                            | uneventful                                 | uneventful                                            |
| Neonatal problems                                                         | 3 weeks in NICU                                 | U                  | U                 | -                                             | Apgar 6-9-9, insufflation breaths and PEEP. Ventilatory assistance 4 days after birth | -                                          | primary cesarean (1st pregnancy breech position)      |
| Birth Weight, g (SD)                                                      | 2600g (-1.75SD)                                 | 3400g (0SD)        | U                 | 4100g (+1.4SD)                                | 3482g (+0.27SD)                                                                       | 3886g (+1.05SD)                            | 3780g (SD +0.81SD)                                    |
| Birth Length, cm (SD)                                                     | 51 cm (0SD)                                     | U                  | U                 | 55 cm (+2.7SD)                                | U                                                                                     | 55 cm (+2.7SD)                             | 50.8 cm (+0.59SD)                                     |
| Birth OFC, cm (SD)                                                        | 35 cm (+0.1 SD)                                 | U                  | U                 | 39cm (+3.0SD)                                 | U                                                                                     | 35 cm (+0.1SD)                             | 38 cm (SD +1.82SD)                                    |
| Weight at last observation, kg (SD)                                       | 37.7 kg (-0.44SD)                               | 21.5 kg (+1.29SD)  | 13.3 kg (+1.16SD) | 15 kg (+2.8SD)                                | 26.2 kg (+1.65SD)                                                                     | 21.5 kg (+2.11SD)                          | 9.995 kg (-0.88SD)                                    |
| Height at last observation, cm (SD)                                       | 139.7 cm (-1.62SD)                              | 109.8 cm (+0.43SD) | 86 cm (+0.08SD)   | 92.5 cm (+3.65SD)                             | 120.2 cm (+0.99SD)                                                                    | 106 cm (+0.64SD)                           | 77.1 cm (-0.93SD)                                     |
| OFC at last observation, cm (SD)                                          | 58.8 cm (+3.98SD)                               | 55 cm (+3.53SD)    | 49.4 cm (+1.07SD) | 47.3 cm (+0.41SD)                             | 56 cm (+2.94SD) at age 6y 9m                                                          | 56 cm (+3.68SD)                            | 50.7 cm (+3.19SD)                                     |
| <b>Growth</b>                                                             |                                                 |                    |                   |                                               |                                                                                       |                                            |                                                       |
| Delay/ ID : mild=1; moderate=2; severe=3, unspecified                     | 2                                               | 0                  | unspecified       | 2                                             | 2                                                                                     | 1                                          | 2                                                     |
| Sitting unsupported (months)                                              | 12                                              | 11                 | U                 | 8                                             | 14                                                                                    | 9                                          | 9                                                     |
| Walking independently (months)                                            | 30                                              | 30                 | U                 | not yet at 2y 9m, can make steps with support | 66                                                                                    | 15                                         | not yet but crawling                                  |
| Motor delay                                                               | +                                               | +                  | U                 | +                                             | +                                                                                     | +                                          | +                                                     |
| Speech delay                                                              | +                                               | +                  | U                 | +                                             | +                                                                                     | +                                          | +                                                     |
| Hypotonia                                                                 | +                                               | +                  | U                 | -                                             | +                                                                                     | +                                          | +                                                     |
| Seizures, type and treatment                                              | single childhood seizure                        | U                  | febrile seizures  | febrile                                       | recurrent status epilepticus, valproate treatment                                     | -                                          | -                                                     |
| Hearing loss                                                              | -                                               | U                  | +                 | -                                             | -                                                                                     | -                                          | bilateral mild to moderate sensorineural hearing loss |
| Frequent otitis media                                                     | +                                               | U                  | U                 | -                                             | -                                                                                     | - (two times)                              | -                                                     |
| <b>Eye defects</b>                                                        | +                                               | +                  | U                 | U                                             | +                                                                                     | lacrimal duct stenosis (operation at 1.5y) | +                                                     |
| Hypermetropia (H)/ myopia (M)                                             | M                                               | U                  | U                 | -                                             | H                                                                                     | -                                          | M                                                     |
| Astigmatism                                                               | +                                               | U                  | U                 | -                                             | -                                                                                     | -                                          | +                                                     |
| Strabismus                                                                | -                                               | +                  | U                 | -                                             | +                                                                                     | (exotropia)                                | -                                                     |

|                                                       | Subject 7             | Subject 8                                                                 | Subject 9  | Subject 10                       | Subject 11         | Subject 12                                                        | Subject 13                       |
|-------------------------------------------------------|-----------------------|---------------------------------------------------------------------------|------------|----------------------------------|--------------------|-------------------------------------------------------------------|----------------------------------|
| <b>Craniofacial features</b>                          |                       |                                                                           |            |                                  |                    |                                                                   |                                  |
| Coarse face                                           | -                     | U                                                                         | U          | +                                | +                  | +                                                                 | +                                |
| High hairline                                         | +                     | +                                                                         | U          | +                                | +                  | +                                                                 | +                                |
| Abnormal hair                                         | -                     | U                                                                         | U          | -                                | thin hair          | -                                                                 | -                                |
| Prominent forehead                                    | +                     | +                                                                         | +          | +                                | +                  | +                                                                 | +                                |
| Bitemporal narrowing                                  | U                     | U                                                                         | U          | U                                | U                  | U                                                                 | +                                |
| Epicanthus/telecanthus                                | U                     | epicanthus                                                                | epicanthus | U                                | U                  | -                                                                 | +                                |
| Downward slant palpebral fissures                     | -                     | +                                                                         | U          | + (accentuated by puffy eyelids) | -                  | -                                                                 | +                                |
| Deepset eyes                                          | U                     | U                                                                         | +          | U                                | U                  | +                                                                 | -                                |
| Ptosis                                                | -                     | U                                                                         | U          | -                                | -                  | -                                                                 | + (mild)                         |
| Hypertelorism                                         | +                     | U                                                                         | U          | +                                | +                  | +                                                                 | +                                |
| Small/pointed chin                                    | -                     | U                                                                         | U          | -                                | -                  | -                                                                 | +                                |
| Nasal bridge anomalies                                | -                     | wide                                                                      | wide       | wide                             | wide               | wide                                                              | -                                |
| Upturned nasal tip                                    | -                     | +                                                                         | U          | -                                | +                  | -                                                                 | +                                |
| Full nasal tip                                        | +                     | U                                                                         | +          | +                                | +                  | +                                                                 | +                                |
| Thick alae nasi                                       | -                     | U                                                                         | U          | -                                | -                  | +                                                                 | +                                |
| Short nose                                            | -                     | U                                                                         | U          | -                                | -                  | -                                                                 | +                                |
| Prominent cheek bones                                 | U                     | U                                                                         | U          | U                                | U                  | -                                                                 | -                                |
| Smooth philtrum                                       | -                     | U                                                                         | U          | -                                | -                  | -                                                                 | -                                |
| Broad philtrum                                        | -                     | U                                                                         | U          | -                                | -                  | -                                                                 | -                                |
| Long philtrum                                         | -                     | U                                                                         | U          | -                                | -                  | -                                                                 | +                                |
| Mouth abnormalities                                   | thin upper vermillion | U                                                                         | U          | -                                | -                  | thin upper vermillion, thick lower vermillion, drooping lower lip | thin upper vermillion            |
| Micrognathia                                          | U                     | U                                                                         | U          | U                                | U                  | -                                                                 | -                                |
| Widely spaced teeth                                   | -                     | U                                                                         | U          | +                                | U                  | +                                                                 | -                                |
| Enlarged tongue                                       | U                     | U                                                                         | U          | U                                | U                  | -                                                                 | -                                |
| Ear abnormalities                                     | low set               | U                                                                         | low set    | low set, protruding              | -                  | low set, rotated ears                                             | low set, posteriorly rotated     |
| Hand abnormalities                                    | -                     | tapering fingers, 5th finger clinodactyly, bilateral single palmar crease | U          | tapering fingers, broad thumbs   | small hands        | relatively large hands                                            | single transverse palmar creases |
| Joint hyperlaxity/stiffness                           | -                     | U                                                                         | U          | -                                | -                  | -                                                                 | +                                |
| <b>Nail anomalies</b>                                 | -                     | U                                                                         | U          | -                                | -                  | flaky nails                                                       | -                                |
| <b>Feet abnormalities (flat feet, sandal gap,...)</b> | -                     | bilateral pes planus                                                      | U          | -                                | orthopedic insoles | -                                                                 | -                                |
| <b>Toe abnormalities</b>                              | -                     | 5th toe overlaps 4th toe                                                  | U          | -                                | U                  | relatively large feet                                             | overlapping toes                 |
| <b>RX abnormalities</b>                               | advanced bone age     | -                                                                         | U          | U                                | -                  | advanced bone age                                                 | scoliosis                        |
| <b>Other limb abnormalities</b>                       | -                     | U                                                                         | U          | -                                | valgus hips        | -                                                                 | hip dysplasia                    |

|                                                                                 | Subject 7                           | Subject 8                                                                                  | Subject 9 | Subject 10                                                   | Subject 11                                                                                    | Subject 12                                                                                                | Subject 13                                       |
|---------------------------------------------------------------------------------|-------------------------------------|--------------------------------------------------------------------------------------------|-----------|--------------------------------------------------------------|-----------------------------------------------------------------------------------------------|-----------------------------------------------------------------------------------------------------------|--------------------------------------------------|
| <b>Other</b>                                                                    |                                     |                                                                                            |           |                                                              |                                                                                               | hemangioma leg                                                                                            | gastroesophageal reflux disease                  |
| Skull abnormalities                                                             | -                                   | U                                                                                          | U         | scaphocephaly                                                | scaphocephaly                                                                                 | U                                                                                                         | dolichocephaly with patent sagittal suture       |
| Cryptorchidism                                                                  | bilateral                           | U                                                                                          | -         | bilateral                                                    | -                                                                                             | +                                                                                                         | -                                                |
| Renal abnormalities                                                             | U                                   | U                                                                                          | U         | U                                                            | U                                                                                             | U                                                                                                         | U                                                |
| Skin                                                                            | -                                   | flat hyperpigmented patches on abdomen and thighs (dad attributes to post viral infection) | U         | -                                                            | -                                                                                             | mild cutis laxa in abdominal area                                                                         | -                                                |
| Scoliosis (mild, severe)                                                        | -                                   | U                                                                                          | U         | -                                                            | -                                                                                             | -                                                                                                         | mild                                             |
| Widely spaced/inverted nipples                                                  | -                                   | U                                                                                          | U         | -                                                            | -                                                                                             | +                                                                                                         |                                                  |
| Cardiac abnormalities                                                           | -                                   | U                                                                                          | U         | -                                                            | -                                                                                             | atrial septum defect                                                                                      | small atrial septum defect                       |
| Pectus excavatum/carinatum                                                      | -                                   | U                                                                                          | U         | -                                                            | -                                                                                             | -                                                                                                         | -                                                |
| dentition (normal; pointed; delayed prim / delayed permanent/missing permanent) | crowded teeth                       | U                                                                                          | U         | small teeth, widely spaced                                   | tooth dysgenesis with extreme short radices of milk molars with 4 elementes missing           | early eruption of teeth                                                                                   | high arched palate                               |
| sleep problems                                                                  | -                                   | U                                                                                          | U         | -                                                            | U                                                                                             | -                                                                                                         | -                                                |
| Laboratory abnormalities                                                        | -                                   | U                                                                                          | U         | -                                                            | -                                                                                             | -                                                                                                         | -                                                |
| <b>Neuroradiology</b>                                                           |                                     |                                                                                            |           |                                                              |                                                                                               |                                                                                                           | -                                                |
| MRI brain (at age in months)                                                    | 3 y; repeat 5y                      | U                                                                                          | U         | 12 m                                                         | 5m                                                                                            | U                                                                                                         | 14m                                              |
| MRI brain abnormality                                                           | partial agenesis of corpus callosum | periventricular white matter abnormality                                                   | U         | arachnoid cyst                                               | cavum septum pellucidum                                                                       | U                                                                                                         | Mild prominence of the subarachnoid fluid spaces |
| <b>Autism/Behavioral problems</b>                                               | ADHD                                | self-stimulatory behaviors                                                                 | U         | stereotypic movements with hands, rolls with eyes when tired | -                                                                                             | -                                                                                                         | none at 17m                                      |
| Clinical diagnosis/tested for:                                                  | U                                   | U                                                                                          | U         | CMA and metabolic screening normal                           | Clinical suspicion of Sotos syndrome NSD1, PTEN and EZH2 genes normal, FXS normal, CMA normal | Clinical suspicion of Simpson-Golabi-Behmel syndrome; CMA, metabolic screening, FXS and gene panel normal | Rasopthay panel normal; SNP array normal; WES    |

|                                                                           | <b>Subject 14</b>                                                                      | <b>Subject 15</b>                        | <b>Subject 16</b>               | <b>Subject 17</b>                          | <b>Subject 18</b>                          | <b>Subject 19</b>                      | <b>Subject 20</b>                      |
|---------------------------------------------------------------------------|----------------------------------------------------------------------------------------|------------------------------------------|---------------------------------|--------------------------------------------|--------------------------------------------|----------------------------------------|----------------------------------------|
| <i>Previously reported</i>                                                | <i>Duffney et al. 2018</i>                                                             | <i>Takenouchi et al. 2018</i>            | <i>Tatton-Brown et al. 2017</i> | <i>Tatton-Brown et al. 2017</i>            | <i>Tatton-Brown et al. 2017</i>            | <i>Tatton-Brown et al. 2017</i>        | <i>Tatton-Brown et al. 2017</i>        |
| <b>Mutation</b>                                                           |                                                                                        |                                          |                                 |                                            |                                            |                                        |                                        |
| cDNA (NM_005321.2)                                                        | c.435dupC                                                                              | c.433dup                                 | c.430dupG                       | c.441dupC                                  | c.441dupC                                  | c.436_458del23                         | c.430dupG                              |
| Protein change ( <a href="http://www.mutalyzer.nl">www.mutalyzer.nl</a> ) | p.Thr146Hisfs*50                                                                       | p.Ala145Glyfs*51                         | p.Ala144Glyfs*52                | p.Lys148Glnfs*48                           | p.Lys148Glnfs*48                           | p.Thr146Aspfs*42                       | p.Ala144Glyfs*52                       |
| De novo inheritance                                                       | +                                                                                      | +                                        | +                               | +                                          | U                                          | +                                      | +                                      |
| <b>Epidemiology</b>                                                       |                                                                                        |                                          |                                 |                                            |                                            |                                        |                                        |
| Origin                                                                    | caucasian                                                                              | asian                                    | caucasian                       | caucasian                                  | U                                          | U                                      | caucasian                              |
| Gender                                                                    | male                                                                                   | female                                   | female                          | male                                       | female                                     | female                                 | male                                   |
| Age (years) at last observation                                           | 10y                                                                                    | 21y                                      | 13y                             | 15y 6m                                     | 4y 3m                                      | 1y 10m                                 | 8y 6m                                  |
| Duration gestation (weeks)                                                | 38w                                                                                    | 36w                                      | at term                         | 41w                                        | at term                                    | 37w                                    | 41w                                    |
| Pregnancy                                                                 | early delivery (maternal car accident at 38 weeks)                                     | U                                        | U                               | uneventful                                 | U                                          | uneventful                             | complicated by exposure to chicken pox |
| Neonatal problems                                                         | 2 weeks in NICU, jaundice, micrognathia increased muscle tone and feeding difficulties | U                                        | congenital hypotonia            | congenital hypotonia, feeding difficulties | congenital hypotonia, feeding difficulties | hypoglycemia and increased muscle tone | U                                      |
| Birth Weight, g (SD)                                                      | 3200g (-0.3SD)                                                                         | 2876g (+1.6SD)                           | 3580g (+0.47SD)                 | 4750g (+2.4SD)                             | 4790g (+2.62SD)                            | 3250g (+0.8SD)                         | 3740g (+0.78SD)                        |
| Birth Length, cm (SD)                                                     | 49.5cm (-0.2SD)                                                                        | 49cm (+1.4SD)                            | 53cm (+1.65SD)                  | U                                          | 57cm (+3.76SD)                             | 49cm (+0.7SD)                          | U                                      |
| Birth OFC, cm (SD)                                                        | U                                                                                      | 33.4 cm (+0.9SD)                         | U                               | U                                          | U                                          | 37cm (+3.3SD)                          | U                                      |
| Weight at last observation, kg (SD)                                       | 54.5 kg (+2.66SD)                                                                      | U                                        | 48.8 kg (+0.4SD)                | U                                          | 24 kg (+2.45SD)                            | 12 kg (+0.65SD)                        | 33 kg (+1.34SD)                        |
| Height at last observation, cm (SD)                                       | 144.8 cm (+0.96SD)                                                                     | 151.8 cm (-1.74SD)                       | 150.8 cm (-0.8SD)               | 166.5 cm (-0.6SD)                          | 108 cm (+0.8SD)                            | 85 cm (+0.12SD)                        | 133.2 cm (+0.56SD)                     |
| OFC at last observation, cm (SD)                                          | 53 cm (+0.25SD)                                                                        | 54.4 cm (-0.15SD; relative macrocephaly) | 55.8 cm (+1.57SD)               | 58.7 cm (+2.03SD)                          | 55 cm (+3.78SD)                            | 51 cm (+2.65SD)                        | 59 cm (+4.92SD) at age 6,3             |
| <b>Growth</b>                                                             |                                                                                        |                                          |                                 |                                            |                                            |                                        |                                        |
| Delay/ ID : mild=1; moderate=2; severe=3, unspecified                     | 2                                                                                      | 3                                        | 1                               | 2                                          | unspecified                                | 2                                      | 3                                      |
| Sitting unsupported (months)                                              | 9                                                                                      | U                                        | U                               | U                                          | U                                          | U                                      | U                                      |
| Walking independently (months)                                            | 24                                                                                     | 30                                       | U                               | U                                          | U                                          | U                                      | U                                      |
| Motor delay                                                               | +                                                                                      | U                                        | U                               | U                                          | U                                          | U                                      | U                                      |
| Speech delay                                                              | +                                                                                      | +                                        | U                               | U                                          | U                                          | U                                      | +                                      |
| Hypotonia                                                                 | -                                                                                      | U                                        | +                               | +                                          | +                                          | U                                      | U                                      |
| Seizures, type and treatment                                              | single childhood seizure                                                               | U                                        | U                               | U                                          | U                                          | U                                      | U                                      |
| Hearing loss                                                              | -                                                                                      | U                                        | U                               | U                                          | U                                          | U                                      | -                                      |
| Frequent otitis media                                                     | -                                                                                      | U                                        | U                               | U                                          | U                                          | U                                      | U                                      |
| <b>Eye defects</b>                                                        | U                                                                                      | cataracts at age 21y                     | U                               | U                                          | U                                          | U                                      | delayed visual maturation              |
| Hypermetropia (H)/ myopia (M)                                             | -                                                                                      | U                                        | U                               | U                                          | U                                          | U                                      | U                                      |
| Astigmatism                                                               | +                                                                                      | U                                        | U                               | U                                          | U                                          | U                                      | +                                      |
| Strabismus                                                                | +                                                                                      | +                                        | +                               | U                                          | U                                          | U                                      | left amblyopia                         |

|                                                       | Subject 14                      | Subject 15                        | Subject 16        | Subject 17       | Subject 18 | Subject 19    | Subject 20         |
|-------------------------------------------------------|---------------------------------|-----------------------------------|-------------------|------------------|------------|---------------|--------------------|
| <b>Craniofacial features</b>                          |                                 |                                   |                   |                  |            |               |                    |
| Coarse face                                           | -                               | U                                 | U                 | U                | U          | U             | U                  |
| High hairline                                         | -                               | +                                 | +                 | U                | U          | U             | U                  |
| Abnormal hair                                         | -                               | U                                 | U                 | U                | U          | U             | U                  |
| Prominent forehead                                    | -                               | U                                 | U                 | U                | U          | U             | U                  |
| Bitemporal narrowing                                  | U                               | U                                 | U                 | U                | U          | U             | U                  |
| Epicanthus/telecanthus                                | U                               | epicanthus                        | telecanthus       | U                | U          | U             | U                  |
| Downward slant palpebral fissures                     | +                               | U (short)                         | U                 | U                | U          | U             | U                  |
| Deepset eyes                                          | U                               | U                                 | U                 | U                | U          | U             | U                  |
| Ptosis                                                | -                               | U                                 | U                 | U                | U          | U             | U                  |
| Hypertelorism                                         | +                               | U                                 | U                 | U                | U          | U             | U                  |
| Small/pointed chin                                    | +                               | U                                 | U                 | U                | U          | U             | U                  |
| Nasal bridge anomalies                                | low                             | wide                              | U                 | U                | U          | U             | U                  |
| Upturned nasal tip                                    | -                               | U                                 | U                 | U                | U          | U             | U                  |
| Full nasal tip                                        | -                               | U                                 | U                 | U                | U          | U             | U                  |
| Thick alae nasi                                       | -                               | U                                 | U                 | U                | U          | U             | U                  |
| Short nose                                            | -                               | U                                 | U                 | U                | U          | U             | U                  |
| Prominent cheek bones                                 | U                               | +                                 | U                 | U                | U          | U             | U                  |
| Smooth philtrum                                       | +                               | U                                 | U                 | U                | U          | U             | U                  |
| Broad philtrum                                        | +                               | U                                 | U                 | U                | U          | U             | U                  |
| Long philtrum                                         | +                               | +                                 | U                 | U                | U          | U             | U                  |
| Mouth abnormalities                                   | accentuated Cupid's bow         | high-arched, wide uvula           | U                 | U                | U          | U             | U                  |
| Micrognathia                                          | +                               | U                                 | U                 | U                | U          | U             | U                  |
| Widely spaced teeth                                   | -                               | U                                 | U                 | U                | U          | U             | U                  |
| Enlarged tongue                                       | U                               | U                                 | U                 | U                | U          | U             | U                  |
| Ear abnormalities                                     | -                               | simple auricles                   | U                 | U                | U          | U             | U                  |
| Hand abnormalities                                    | clinodactyly for 5th fingers    | bilateral 5th finger clinodactyly | U                 | U                | U          | camptodactyly | U                  |
| Joint hyperlaxity/stiffness                           | +                               | U                                 | U                 | U                | U          | U             | U                  |
| <b>Nail anomalies</b>                                 | +, nail hypoplasia              | U                                 | U                 | dry, flaky nails | U          | U             | U                  |
| <b>Feet abnormalities (flat feet, sandal gap,...)</b> | pes planus                      | U                                 | U                 | U                | U          | U             | talipes equi-varus |
| <b>Toe abnormalities</b>                              | long halluces                   | U                                 | U                 | U                | U          | U             | U                  |
| <b>RX abnormalities</b>                               | multiple small stress fractures | U                                 | advanced bone age | U                | U          | U             | U                  |
| <b>Other limb abnormalities</b>                       | -                               | U                                 | U                 | U                | U          | U             | U                  |



|                                                                                 | Subject 14                                                           | Subject 15                                    | Subject 16                   | Subject 17                                                          | Subject 18 | Subject 19                            | Subject 20                                            |
|---------------------------------------------------------------------------------|----------------------------------------------------------------------|-----------------------------------------------|------------------------------|---------------------------------------------------------------------|------------|---------------------------------------|-------------------------------------------------------|
| <b>Other</b>                                                                    |                                                                      |                                               |                              |                                                                     |            |                                       |                                                       |
| Skull abnormalities                                                             | -                                                                    | U                                             | U                            | U                                                                   | U          | U                                     | U                                                     |
| Cryptorchidism                                                                  | -                                                                    | U                                             | -                            | bilateral                                                           | U          | U                                     | U                                                     |
| Renal abnormalities                                                             | U                                                                    | U                                             | U                            | U                                                                   | U          | U                                     | U                                                     |
| Skin                                                                            | -                                                                    | hyperkeratosis,<br>multiple lentiginos        | U                            | multiple nevi,<br>redundant skin on<br>palm of hands                | U          | U                                     | U                                                     |
| Scoliosis (mild, severe)                                                        | severe                                                               | U                                             | severe                       | U                                                                   | U          | U                                     | U                                                     |
| Widely spaced/inverted nipples                                                  | +                                                                    | inverted nipples                              | U                            | U                                                                   | U          | U                                     | U                                                     |
| Cardiac abnormalities                                                           | -                                                                    | U                                             | U                            | U                                                                   | U          | U                                     | U                                                     |
| Pectus excavatum/carinatum                                                      | -                                                                    | U                                             | U                            | U                                                                   | U          | U                                     | U                                                     |
| dentition (normal; pointed; delayed prim / delayed permanent/missing permanent) | multiple caries                                                      | U                                             | U                            | major dental problems with crumbling teeth                          | U          | U                                     | U                                                     |
| sleep problems                                                                  | '+ (staying asleep, gets up at night and can't go back to sleep)     | U                                             | U                            | U                                                                   | U          | U                                     | U                                                     |
| Laboratory abnormalities                                                        | U                                                                    | diabetes mellitus                             | U                            | U                                                                   | U          | U                                     | U                                                     |
| <b>Neuroradiology</b>                                                           |                                                                      |                                               |                              |                                                                     |            |                                       |                                                       |
| MRI brain (at age in months)                                                    | 24m                                                                  | U                                             | 4m                           | U                                                                   | U          | U                                     | U                                                     |
| MRI brain abnormality                                                           | arachnoid cyst and mild hydrocephalus                                | U                                             | mild ventricular enlargement | U                                                                   | U          | U                                     | thin corpus callosum and periventricular leukomalacia |
| <b>Autism/Behavioral problems</b>                                               | lack of eye contact, ADHD, obsessive behaviors with fixated interest | auditory hypersensitivity, high pitched voice | U                            | anxiety disorder refractory to medical treatment, developed phobias | U          | U                                     | challenging behavior                                  |
| Clinical diagnosis/tested for:                                                  | SHANK3 related disorder and FXS screening normal, CMA normal         | U                                             | U                            | U                                                                   | U          | Clinical suspicion of Weaver syndrome | U                                                     |



**Table S4.** List of the CpG sites located in the promoter regions (200-1500 bp from transcription start sites, TSS) of genes found to be differentially methylated in affected individuals with *HIST1H1E* mutations and controls.

| IlmnID     | CHR | MAPINFO   | UCSC RefGene Name                                                                               | UCSC RefGene Group                                                         | mean controls | mean Pt1 | mean other patients |
|------------|-----|-----------|-------------------------------------------------------------------------------------------------|----------------------------------------------------------------------------|---------------|----------|---------------------|
| cg25880954 | 1   | 47900630  | MGC12982;FOXD2                                                                                  | TSS1500;TSS1500                                                            | 0.78          | 0.91     | 0.81                |
| cg04863005 | 1   | 59043208  | TACSTD2                                                                                         | TSS200                                                                     | 0.39          | 0.09     | 0.31                |
| cg15100762 | 1   | 66516476  | LOC101927139;PDE4B;PDE4B;<br>PDE4B;PDE4B;PDE4B                                                  | TSS200;Body;Body;Body;Body;<br>Body                                        | 0.85          | 0.93     | 0.95                |
| cg09408571 | 1   | 101003634 | GPR88                                                                                           | TSS200                                                                     | 0.63          | 0.79     | 0.72                |
| cg06223162 | 1   | 101003688 | GPR88                                                                                           | TSS200                                                                     | 0.46          | 0.54     | 0.43                |
| cg16180556 | 1   | 110230269 | GSTM1;GSTM1                                                                                     | TSS200;TSS200                                                              | 0.29          | 0.28     | 0.52                |
| cg24506221 | 1   | 110230401 | GSTM1;GSTM1                                                                                     | TSS200;TSS200                                                              | 0.24          | 0.38     | 0.48                |
| cg20803293 | 1   | 110254709 | GSTM5                                                                                           | TSS200                                                                     | 0.35          | 0.27     | 0.51                |
| cg16810724 | 1   | 110752159 | KCNC4-AS1;KCNC4;KCNC4;KCNC4                                                                     | Body;TSS1500;TSS1500;TSS1500                                               | 0.62          | 0.64     | 0.49                |
| cg06205333 | 1   | 112161618 | RAP1A;RAP1A                                                                                     | TSS1500;TSS1500                                                            | 0.61          | 0.82     | 0.48                |
| cg10185505 | 1   | 150335496 | RPRD2;RPRD2;RPRD2                                                                               | TSS1500;TSS1500;TSS1500                                                    | 0.72          | 0.54     | 0.56                |
| cg12650227 | 1   | 152572930 | LCE3C                                                                                           | TSS1500                                                                    | 0.61          | 0.19     | 0.56                |
| cg08477332 | 1   | 153590243 | S100A14                                                                                         | TSS1500                                                                    | 0.35          | 0.43     | 0.45                |
| cg23216745 | 1   | 154929762 | PBXIP1;PYGO2                                                                                    | TSS1500;3'UTR                                                              | 0.82          | 0.89     | 0.90                |
| cg27003165 | 1   | 162381929 | SH2D1B                                                                                          | TSS200                                                                     | 0.52          | 0.40     | 0.67                |
| cg13124890 | 1   | 162382662 | SH2D1B                                                                                          | TSS1500                                                                    | 0.49          | 0.28     | 0.67                |
| cg01062020 | 1   | 162382848 | SH2D1B                                                                                          | TSS1500                                                                    | 0.32          | 0.08     | 0.47                |
| cg19368440 | 1   | 164744070 | LOC100505795;PBX1;PBX1;PBX1                                                                     | TSS200;Body;Body;Body                                                      | 0.32          | 0.55     | 0.79                |
| cg07533224 | 1   | 205819345 | PM20D1                                                                                          | TSS200                                                                     | 0.43          | 0.52     | 0.48                |
| cg12898220 | 1   | 205819356 | PM20D1                                                                                          | TSS200                                                                     | 0.48          | 0.57     | 0.51                |
| cg05841700 | 1   | 205819383 | PM20D1                                                                                          | TSS200                                                                     | 0.36          | 0.30     | 0.37                |
| cg11965913 | 1   | 205819406 | PM20D1                                                                                          | TSS200                                                                     | 0.26          | 0.25     | 0.28                |
| cg07167872 | 1   | 205819463 | PM20D1                                                                                          | TSS200                                                                     | 0.36          | 0.42     | 0.34                |
| cg24503407 | 1   | 205819492 | PM20D1                                                                                          | TSS1500                                                                    | 0.37          | 0.46     | 0.40                |
| cg16334093 | 1   | 205819600 | PM20D1                                                                                          | TSS1500                                                                    | 0.49          | 0.51     | 0.53                |
| cg07157834 | 1   | 205819609 | PM20D1                                                                                          | TSS1500                                                                    | 0.53          | 0.57     | 0.62                |
| cg00541777 | 2   | 3652840   | COLEC11;COLEC11;COLEC11;COLEC11;<br>COLEC11;COLEC11;COLEC11;COLEC11;<br>COLEC11;COLEC11;COLEC11 | TSS1500;TSS1500;TSS1500;TSS1500;<br>Body;Body;Body;Body;Body;Body;<br>Body | 0.73          | 0.66     | 0.81                |
| cg10326673 | 2   | 30669757  | LCLAT1;LCLAT1;LCLAT1;LCLAT1                                                                     | TSS1500;TSS1500;TSS1500;TSS1500                                            | 0.23          | 0.50     | 0.42                |
| cg15652532 | 2   | 30669759  | LCLAT1;LCLAT1                                                                                   | TSS1500;TSS1500                                                            | 0.23          | 0.52     | 0.39                |
| cg24521141 | 2   | 38744309  | LOC101929596                                                                                    | TSS1500                                                                    | 0.78          | 0.95     | 0.89                |
| cg05043910 | 2   | 99872119  | LYG2                                                                                            | TSS1500                                                                    | 0.52          | 0.53     | 0.60                |
| cg23122642 | 2   | 113992694 | PAX8-AS1;PAX8-AS1;PAX8;PAX8;<br>PAX8;PAX8                                                       | TSS1500;TSS1500;Body;Body;Body;<br>Body                                    | 0.61          | 0.52     | 0.58                |
| cg21482265 | 2   | 113992762 | PAX8;PAX8;PAX8;PAX8;PAX8;LOC440<br>839;LOC654433                                                | Body;Body;Body;Body;Body;Body;<br>TSS1500                                  | 0.67          | 0.61     | 0.68                |
| cg19083407 | 2   | 113993142 | PAX8;PAX8;PAX8;PAX8;PAX8;<br>LOC440839;LOC654433                                                | Body;Body;Body;Body;Body;Body;<br>TSS1500                                  | 0.59          | 0.57     | 0.57                |
| cg08010094 | 2   | 139539001 | NXPH2                                                                                           | TSS1500                                                                    | 0.52          | 0.18     | 0.38                |
| cg19840088 | 2   | 149894678 | LYPD6B                                                                                          | TSS1500                                                                    | 0.60          | 0.93     | 0.64                |
| cg20351137 | 2   | 177133606 | MTX2;MTX2                                                                                       | TSS1500;TSS1500                                                            | 0.63          | 0.67     | 0.49                |
| cg16955800 | 2   | 183981465 | NUP35                                                                                           | TSS1500                                                                    | 0.34          | 0.45     | 0.21                |
| cg20517941 | 2   | 201600636 | LOC100507140;AOX2P                                                                              | TSS1500;Body                                                               | 0.22          | 0.39     | 0.33                |
| cg21893210 | 2   | 220108407 | GLB1L;GLB1L;GLB1L                                                                               | 5'UTR;5'UTR;TSS200                                                         | 0.39          | 0.49     | 0.20                |
| cg24061197 | 2   | 220108496 | GLB1L;GLB1L;GLB1L                                                                               | 5'UTR;5'UTR;TSS200                                                         | 0.42          | 0.59     | 0.27                |
| cg01588581 | 2   | 241832900 | C2orf54;C2orf54                                                                                 | TSS1500;Body                                                               | 0.50          | 0.41     | 0.55                |
| cg01904194 | 2   | 241832904 | C2orf54;C2orf54;C2orf54                                                                         | TSS1500;TSS1500;Body                                                       | 0.60          | 0.45     | 0.62                |
| cg08144588 | 3   | 3080327   | CNTN4;CNTN4;CNTN4                                                                               | Body;TSS1500;Body                                                          | 0.81          | 0.94     | 0.75                |
| cg00457450 | 3   | 15107267  | MRPS25                                                                                          | TSS1500                                                                    | 0.74          | 0.30     | 0.38                |
| cg08033130 | 3   | 45983597  | CXCR6;FYCO1                                                                                     | TSS1500;Body                                                               | 0.43          | 0.34     | 0.56                |
| cg20540428 | 3   | 73045686  | PPP4R2                                                                                          | TSS1500                                                                    | 0.35          | 0.20     | 0.51                |
| cg06085042 | 3   | 195425033 | MIR570                                                                                          | TSS1500                                                                    | 0.59          | 0.50     | 0.66                |
| cg15727583 | 3   | 196757701 | MF12;MF12                                                                                       | TSS1500;TSS1500                                                            | 0.77          | 0.97     | 0.85                |
| cg01132407 | 4   | 645781    | PDE6B;PDE6B;PDE6B                                                                               | TSS1500;Body;Body                                                          | 0.65          | 0.85     | 0.50                |
| cg19247841 | 4   | 48485301  | SLC10A4                                                                                         | TSS200                                                                     | 0.11          | 0.53     | 0.08                |
| cg19978674 | 4   | 57523826  | HOPX;HOPX;HOPX;HOPX;HOPX                                                                        | 5'UTR;Body;Body;TSS1500;TSS1500                                            | 0.35          | 0.21     | 0.64                |

|            |    |           |                                                             |                                                             |      |      |      |
|------------|----|-----------|-------------------------------------------------------------|-------------------------------------------------------------|------|------|------|
| cg07952421 | 4  | 69435601  | UGT2B15;UGT2B17                                             | TSS1500;TSS1500                                             | 0.70 | 0.86 | 0.82 |
| cg12011299 | 4  | 100065546 | ADH4                                                        | TSS200                                                      | 0.40 | 0.29 | 0.62 |
| cg05635388 | 4  | 122721892 | EXOSC9;EXOSC9                                               | TSS1500;TSS1500                                             | 0.62 | 0.60 | 0.39 |
| cg04096619 | 5  | 9547595   | SNORD123;SEMA5A                                             | TSS1500;TSS1500                                             | 0.81 | 0.93 | 0.86 |
| cg06961054 | 5  | 56204405  | SETD9;SETD9                                                 | TSS1500;TSS1500                                             | 0.53 | 0.24 | 0.33 |
| cg06795995 | 5  | 56204613  | SETD9;SETD9                                                 | TSS1500;TSS1500                                             | 0.42 | 0.19 | 0.24 |
| cg25340688 | 5  | 135416398 | MIR886                                                      | TSS200                                                      | 0.49 | 0.53 | 0.45 |
| cg03395511 | 6  | 291903    | DUSP22                                                      | TSS200                                                      | 0.32 | 0.52 | 0.26 |
| cg13824270 | 6  | 4020946   | PRPF4B                                                      | TSS1500                                                     | 0.53 | 0.24 | 0.26 |
| cg00944873 | 6  | 24646780  | KIAA0319;KIAA0319;KIAA0319;<br>KIAA0319;KIAA0319            | TSS1500;TSS1500;TSS1500;TSS1500;<br>TSS1500                 | 0.33 | 0.40 | 0.36 |
| cg07792871 | 6  | 29942706  | HCG9                                                        | TSS200                                                      | 0.31 | 0.26 | 0.35 |
| cg17857094 | 6  | 30907280  | DPCR1                                                       | TSS1500                                                     | 0.69 | 0.42 | 0.66 |
| cg05030953 | 6  | 31241000  | HLA-C                                                       | TSS1500                                                     | 0.31 | 0.11 | 0.57 |
| cg03849834 | 6  | 41195891  | TREML4                                                      | TSS200                                                      | 0.81 | 0.40 | 0.79 |
| cg03558010 | 6  | 46890220  | GPR116;GPR116                                               | TSS1500;5'UTR                                               | 0.77 | 0.79 | 0.93 |
| cg02872426 | 6  | 110736772 | DDO;DDO                                                     | TSS200;TSS200                                               | 0.33 | 0.25 | 0.88 |
| cg07164639 | 6  | 110736958 | DDO;DDO                                                     | TSS1500;TSS1500                                             | 0.24 | 0.27 | 0.76 |
| cg21309351 | 6  | 138540608 | KIAA1244;PBOV1                                              | Body;TSS1500                                                | 0.78 | 0.81 | 0.89 |
| cg14593639 | 6  | 142622028 | ADGRG6;ADGRG6;ADGRG6;ADGRG6                                 | TSS1500;TSS1500;TSS1500;TSS1500                             | 0.47 | 0.54 | 0.71 |
| cg05155812 | 7  | 855012    | SUN1;SUN1;SUN1;SUN1                                         | TSS1500;TSS1500;TSS1500;TSS200                              | 0.59 | 0.66 | 0.59 |
| cg08776296 | 7  | 134856544 | C7orf49;C7orf49;C7orf49;C7orf49;<br>C7orf49;C7orf49;C7orf49 | TSS1500;TSS1500;TSS1500;TSS1500;<br>TSS1500;TSS1500;TSS1500 | 0.61 | 0.42 | 0.77 |
| cg00795791 | 7  | 135346062 | PL-5283                                                     | TSS1500                                                     | 0.63 | 0.98 | 0.78 |
| cg17960959 | 7  | 135346502 | C7orf73                                                     | TSS1500                                                     | 0.53 | 0.75 | 0.57 |
| cg21537187 | 7  | 135662562 | MTPN;LUZP6                                                  | TSS1500;TSS1500                                             | 0.68 | 0.19 | 0.71 |
| cg09293560 | 7  | 150068240 | REPIN1;REPIN1;REPIN1;REPIN1                                 | TSS200;5'UTR;Body;5'UTR                                     | 0.59 | 0.77 | 0.64 |
| cg07547279 | 7  | 151433873 | PRKAG2;PRKAG2;PRKAG2                                        | TSS1500;Body;Body                                           | 0.61 | 0.93 | 0.50 |
| cg20877230 | 8  | 6876684   | DEFA3;DEFA1;DEFA1B                                          | TSS1500;TSS1500;TSS1500                                     | 0.48 | 0.57 | 0.49 |
| cg20223677 | 8  | 7332846   | DEFB104B;DEFB104A                                           | TSS1500;TSS1500                                             | 0.73 | 0.90 | 0.89 |
| cg20934259 | 8  | 11997366  | USP17L2;FAM66D                                              | TSS1500;Body                                                | 0.69 | 0.88 | 0.78 |
| cg03983883 | 8  | 79577618  | ZC2HC1A                                                     | TSS1500                                                     | 0.32 | 0.25 | 0.23 |
| cg04046119 | 8  | 107460025 | OXR1;OXR1;OXR1                                              | TSS200;Body;Body                                            | 0.88 | 0.51 | 0.39 |
| cg10596483 | 8  | 143751796 | JRK;JRK                                                     | TSS1500;TSS1500                                             | 0.21 | 0.19 | 0.22 |
| cg03249723 | 9  | 98880057  | LOC158434                                                   | TSS1500                                                     | 0.35 | 0.49 | 0.38 |
| cg21717724 | 9  | 123604514 | PSMD5;LOC253039                                             | Body;TSS1500                                                | 0.66 | 0.70 | 0.40 |
| cg04622888 | 9  | 124990010 | LHX6;LHX6;LHX6;LHX6                                         | TSS200;Body;Body;Body                                       | 0.57 | 0.94 | 0.75 |
| cg13523132 | 9  | 139638566 | LCN6;LCN10                                                  | 3'UTR;TSS1500                                               | 0.85 | 0.82 | 0.77 |
| cg08713344 | 10 | 3183772   | PITRM1-AS1;PITRM1;PITRM1;PITRM1                             | TSS200;Body;Body;Body                                       | 0.66 | 0.91 | 0.79 |
| cg10171609 | 10 | 5405573   | UCN3                                                        | TSS1500                                                     | 0.87 | 0.94 | 0.96 |
| cg10379346 | 10 | 123355239 | FGFR2;FGFR2;FGFR2;FGFR2;FGFR2;<br>FGFR2;FGFR2;FGFR2         | 5'UTR;5'UTR;5'UTR;5'UTR;5'UTR;<br>5'UTR;TSS1500;Body        | 0.46 | 0.90 | 0.51 |
| cg06791446 | 10 | 123355268 | FGFR2;FGFR2;FGFR2;FGFR2;FGFR2;<br>FGFR2;FGFR2               | 5'UTR;5'UTR;5'UTR;5'UTR;TSS1500;<br>5'UTR;5'UTR             | 0.51 | 0.87 | 0.54 |
| cg25460273 | 10 | 129704427 | PTPRE                                                       | TSS1500                                                     | 0.50 | 0.78 | 0.62 |
| cg18493115 | 11 | 1643842   | HCCA2;KRTAP5-4                                              | Body;TSS1500                                                | 0.82 | 0.97 | 0.95 |
| cg07243930 | 11 | 3647365   | TRPC2                                                       | TSS1500                                                     | 0.68 | 0.32 | 0.68 |
| cg15570860 | 11 | 8986840   | TMEM9B;TMEM9B;TMEM9B;TMEM9B-<br>AS1                         | TSS1500;TSS1500;TSS1500;Body                                | 0.70 | 1.00 | 0.74 |
| cg23722437 | 11 | 13983009  | SPON1                                                       | TSS1500                                                     | 0.65 | 0.89 | 0.73 |
| cg23284931 | 11 | 13983273  | SPON1                                                       | TSS1500                                                     | 0.51 | 0.88 | 0.69 |
| cg07093428 | 11 | 18433500  | LDHC;LDHC                                                   | TSS1500;TSS1500                                             | 0.76 | 0.89 | 0.73 |
| cg19767548 | 11 | 18433554  | LDHC;LDHC                                                   | TSS1500;TSS1500                                             | 0.84 | 0.93 | 0.74 |
| cg14332815 | 11 | 18433564  | LDHC;LDHC                                                   | TSS1500;TSS1500                                             | 0.78 | 0.86 | 0.63 |
| cg11821245 | 11 | 18433683  | LDHC;LDHC                                                   | TSS200;TSS200                                               | 0.56 | 0.54 | 0.41 |
| cg07469075 | 11 | 35548139  | PAMR1;PAMR1;PAMR1;PAMR1                                     | TSS1500;TSS1500;TSS1500;5'UTR                               | 0.36 | 0.36 | 0.54 |
| cg01578633 | 11 | 57159066  | PRG2;PRG2;PRG2;PRG2                                         | TSS1500;TSS1500;TSS1500;TSS1500                             | 0.39 | 0.43 | 0.64 |
| cg15971518 | 11 | 57159174  | PRG2                                                        | TSS1500                                                     | 0.28 | 0.14 | 0.51 |
| cg23304078 | 12 | 739312    | LOC100049716;NINJ2;NINJ2                                    | TSS1500;Body;5'UTR                                          | 0.59 | 0.42 | 0.56 |
| cg05578102 | 12 | 739986    | LOC100049716;NINJ2;NINJ2                                    | TSS200;Body;5'UTR                                           | 0.39 | 0.07 | 0.37 |
| cg20927656 | 12 | 7863229   | DPPA3                                                       | TSS1500                                                     | 0.52 | 0.35 | 0.64 |
| cg01120761 | 12 | 7903170   | CLEC4C;CLEC4C                                               | TSS1500;TSS1500                                             | 0.79 | 0.47 | 0.95 |
| cg15411736 | 12 | 9886905   | CLECL1                                                      | TSS1500                                                     | 0.80 | 0.93 | 0.76 |
| cg04531182 | 12 | 10563981  | KLRC4-KLRK1                                                 | TSS1500                                                     | 0.36 | 0.87 | 0.20 |
| cg08041188 | 12 | 10564015  | KLRC4-KLRK1                                                 | TSS1500                                                     | 0.40 | 0.92 | 0.25 |
| cg22221831 | 12 | 15039397  | MGP                                                         | TSS1500                                                     | 0.41 | 0.62 | 0.83 |

|            |    |           |                                                                    |                                                                                 |      |      |      |
|------------|----|-----------|--------------------------------------------------------------------|---------------------------------------------------------------------------------|------|------|------|
| cg11180750 | 12 | 21283013  | SLCO1B1                                                            | TSS1500                                                                         | 0.34 | 0.39 | 0.84 |
| cg02656474 | 12 | 22198837  | CMAS                                                               | TSS1500                                                                         | 0.29 | 0.09 | 0.35 |
| cg03842440 | 12 | 41831532  | PDZRN4;PDZRN4                                                      | TSS200;Body                                                                     | 0.60 | 0.30 | 0.80 |
| cg05788368 | 12 | 110506138 | C12orf76                                                           | TSS1500                                                                         | 0.62 | 0.62 | 0.81 |
| cg13861644 | 12 | 130822286 | PIWIL1                                                             | TSS1500                                                                         | 0.66 | 0.76 | 0.44 |
| cg27630820 | 12 | 130822294 | PIWIL1;PIWIL1                                                      | TSS200;TSS200                                                                   | 0.58 | 0.82 | 0.45 |
| cg19272349 | 13 | 37681255  | CSNK1A1L                                                           | TSS1500                                                                         | 0.66 | 0.71 | 0.61 |
| cg04306507 | 14 | 55594613  | LGALS3                                                             | TSS1500                                                                         | 0.42 | 0.45 | 0.70 |
| cg26251192 | 14 | 74003199  | ACOT1;HEATR4;HEATR4                                                | TSS1500;5'UTR;5'UTR                                                             | 0.57 | 0.59 | 0.58 |
| cg18561199 | 14 | 95027379  | SERPINA4;SERPINA4;SERPINA4                                         | TSS1500;TSS1500;TSS1500                                                         | 0.32 | 0.37 | 0.45 |
| cg03012280 | 15 | 41098255  | ZFYVE19;DNAJC17                                                    | TSS1500;Body                                                                    | 0.61 | 0.57 | 0.70 |
| cg17395184 | 15 | 42750462  | ZFP106                                                             | TSS1500                                                                         | 0.81 | 0.82 | 0.64 |
| cg03433313 | 16 | 819064    | MIR662                                                             | TSS1500                                                                         | 0.78 | 0.91 | 0.62 |
| cg08624915 | 16 | 31538718  | AHSP                                                               | TSS1500                                                                         | 0.73 | 0.40 | 0.72 |
| cg26624021 | 16 | 56995739  | CETP                                                               | TSS200                                                                          | 0.40 | 0.68 | 0.88 |
| cg09889350 | 16 | 56995813  | CETP                                                               | TSS200                                                                          | 0.33 | 0.55 | 0.84 |
| cg17107388 | 16 | 58533766  | NDRG4;NDRG4;NDRG4;NDRG4;<br>NDRG4;NDRG4;NDRG4;NDRG4                | TSS1500;TSS1500;TSS1500;TSS1500;<br>TSS1500;Body;Body;Body                      | 0.66 | 0.38 | 0.30 |
| cg22273830 | 17 | 1508471   | SLC43A2;SLC43A2;SLC43A2                                            | TSS200;Body;Body                                                                | 0.30 | 0.56 | 0.26 |
| cg24587835 | 17 | 5674234   | LOC339166                                                          | TSS1500                                                                         | 0.29 | 0.10 | 0.35 |
| cg13377102 | 17 | 7832764   | KCNAB3                                                             | TSS200                                                                          | 0.88 | 0.66 | 0.31 |
| cg13407335 | 17 | 7832852   | KCNAB3                                                             | TSS200                                                                          | 0.86 | 0.63 | 0.22 |
| cg16513459 | 17 | 7832932   | KCNAB3                                                             | TSS200                                                                          | 0.83 | 0.57 | 0.20 |
| cg01323777 | 17 | 7832943   | KCNAB3                                                             | TSS200                                                                          | 0.88 | 0.64 | 0.19 |
| cg27162435 | 17 | 7833163   | KCNAB3                                                             | TSS1500                                                                         | 0.73 | 0.43 | 0.16 |
| cg14918082 | 17 | 7833237   | KCNAB3                                                             | TSS1500                                                                         | 0.75 | 0.46 | 0.14 |
| cg05513408 | 17 | 39166655  | KRTAP3-1                                                           | TSS1500                                                                         | 0.62 | 0.36 | 0.69 |
| cg11440486 | 17 | 48585216  | MYCBPAP                                                            | TSS1500                                                                         | 0.55 | 0.42 | 0.54 |
| cg20111217 | 17 | 48585264  | MYCBPAP                                                            | TSS1500                                                                         | 0.53 | 0.44 | 0.58 |
| cg00901687 | 17 | 48585270  | MYCBPAP                                                            | TSS1500                                                                         | 0.51 | 0.40 | 0.54 |
| cg07442736 | 17 | 65040607  | CACNG1                                                             | TSS200                                                                          | 0.90 | 0.34 | 0.92 |
| cg01147067 | 17 | 78233766  | RNF213;RNF213                                                      | TSS1500;TSS1500                                                                 | 0.58 | 0.27 | 0.84 |
| cg02398342 | 17 | 80708632  | TBCD;FN3K                                                          | TSS1500;3'UTR                                                                   | 0.53 | 0.36 | 0.41 |
| cg10004653 | 18 | 713071    | ENOSF1;ENOSF1;ENOSF1                                               | TSS1500;TSS1500;TSS1500                                                         | 0.54 | 0.28 | 0.33 |
| cg07100532 | 18 | 713085    | ENOSF1;ENOSF1;ENOSF1                                               | TSS1500;TSS1500;TSS1500                                                         | 0.66 | 0.37 | 0.42 |
| cg25317025 | 18 | 47019823  | RPL17;RPL17;RPL17;RPL17;RPL17;<br>RPL17-C18orf32;RPL17;RPL17;RPL17 | TSS1500;TSS1500;TSS1500;TSS1500;<br>TSS1500;TSS1500;TSS1500;TSS1500;<br>TSS1500 | 0.41 | 0.17 | 0.46 |
| cg04547181 | 19 | 6721855   | C3                                                                 | TSS1500                                                                         | 0.47 | 0.70 | 0.43 |
| cg14279361 | 19 | 6721955   | C3                                                                 | TSS1500                                                                         | 0.23 | 0.39 | 0.23 |
| cg12768975 | 19 | 6721965   | C3                                                                 | TSS1500                                                                         | 0.24 | 0.42 | 0.21 |
| cg16474696 | 19 | 13875014  | MRI1;MRI1                                                          | TSS1500;TSS1500                                                                 | 0.24 | 0.44 | 0.22 |
| cg25755428 | 19 | 13875111  | MRI1;MRI1                                                          | TSS1500;TSS1500                                                                 | 0.34 | 0.67 | 0.34 |
| cg19882830 | 19 | 21264948  | ZNF714;ZNF714;ZNF714;ZNF714                                        | TSS200;TSS200;TSS200;TSS200                                                     | 0.21 | 0.50 | 0.12 |
| cg18805164 | 19 | 36265700  | SNX26                                                              | TSS1500                                                                         | 0.52 | 0.08 | 0.55 |
| cg23489630 | 19 | 44645078  | ZNF234;ZNF234                                                      | TSS1500;TSS1500                                                                 | 0.71 | 0.94 | 0.76 |
| cg22459517 | 19 | 55587193  | EPS8L1                                                             | TSS200                                                                          | 0.59 | 0.68 | 0.51 |
| cg07461715 | 19 | 57989332  | ZNF772;ZNF772                                                      | TSS1500;TSS1500                                                                 | 0.62 | 0.95 | 0.51 |
| cg25325723 | 20 | 6104886   | FERMT1                                                             | TSS1500                                                                         | 0.74 | 0.96 | 0.98 |
| cg14752227 | 20 | 34000481  | UQCC;UQCC                                                          | TSS1500;TSS1500                                                                 | 0.80 | 0.74 | 0.73 |
| cg04305670 | 20 | 43937273  | MATN4;MATN4;MATN4;RBPJL;<br>RBPJL;RBPJL                            | TSS1500;TSS1500;TSS200;Body;<br>Body;Body                                       | 0.59 | 0.78 | 0.74 |
| cg18287711 | 20 | 62288918  | RTEL1;RTEL1;RTEL1;RTEL1;RTEL1-<br>TNFRSF6B                         | TSS1500;TSS1500;TSS1500;TSS1500;<br>TSS1500                                     | 0.70 | 0.24 | 0.31 |
| cg12690462 | 21 | 43822540  | UBASH3A;UBASH3A;UBASH3A                                            | TSS1500;TSS1500;TSS1500                                                         | 0.67 | 0.79 | 0.42 |
| cg10296238 | 21 | 47605174  | C21orf56;C21orf56                                                  | TSS1500;TSS1500                                                                 | 0.30 | 0.05 | 0.19 |
| cg11466708 | 22 | 23974816  | C22orf43                                                           | TSS1500                                                                         | 0.70 | 0.86 | 0.56 |
| cg24989447 | 22 | 31730238  | PIK3IP1-AS1;PATZ1;PATZ1;PATZ1                                      | TSS1500;Body;Body;Body                                                          | 0.53 | 0.68 | 0.79 |
| cg01124132 | 22 | 32599511  | RFPL2;RFPL2;RFPL2                                                  | TSS200;5'UTR;TSS1500                                                            | 0.48 | 0.23 | 0.16 |
| cg27308932 | 22 | 32600139  | RFPL2;RFPL2                                                        | 5'UTR;TSS1500                                                                   | 0.49 | 0.46 | 0.21 |
| cg05019187 | 22 | 32601185  | RFPL2                                                              | TSS1500                                                                         | 0.56 | 0.34 | 0.34 |
| cg08161306 | 22 | 47169227  | TBC1D22A;TBC1D22A;TBC1D22A;<br>TBC1D22A;TBC1D22A                   | TSS1500;5'UTR;Body;Body;Body                                                    | 0.53 | 0.41 | 0.46 |

**Table S5.** Gene set enrichment analyses of KEEG pathway and GO cellular component terms associated with the 1,000 most differentially methylated probes among affected subjects heterozygous for the *HIST1H1E* frameshift mutations and controls.

| GO term    | Description GO term<br>(Cellular Component)  | FDR      | Gene Symbol                                                                                                                                                                                                                                                                                                                                   |
|------------|----------------------------------------------|----------|-----------------------------------------------------------------------------------------------------------------------------------------------------------------------------------------------------------------------------------------------------------------------------------------------------------------------------------------------|
| GO:0098590 | Plasma membrane region                       | 5.69e-11 | ABCG2;ADORA2A;ANXA2;ARHGEF18;BCR;C2CD5;CDH13;CPEB4;DISC1;DLGAP1;EHD2;EPS8L1;ERC1;EXOC1;FERMT1;ITGB2;KANK1;KCNC1;KCNC4;KCNJ10;KIFAP3;MLC1;MYO1D;NDRG4;NRCAM;NRP1;P2RX1;PARD3B;PDE6B;PKD1L1;PLB1;PRR12;PTH1R;RGS14;SCN10A;SCRIB;SLC1A1;SLCO1B1;STK39;SYNE1;SYNJ2;TACSTD2;TANC1;ZFYVE19                                                          |
| GO:0045202 | Synapse                                      | 5.69e-11 | ABR;ADORA2A;APBB2;BCL11A;BCR;CDH13;CPEB4;CPT1C;CYFIP1;DISC1;DLGAP1;DOCK10;ERC1;FGFR2;HDAC4;ITSN1;KCNC1;KCNC4;KCNJ10;MAGI2;MDGA1;NCK2;NRCAM;NRP1;P2RX1;PDE4B;PHACTR1;PLCB1;PRR12;PTPRN2;RAB6B;RAP1A;RGS14;RPS6KB1;SCN10A;SCRIB;SDK1;SLC2A8;SYN3;SYNE1;SYNJ2;TANC1;UCN3                                                                         |
| GO:0097458 | Neuron part                                  | 7.07e-11 | ADORA2A;APBB2;ARID1B;ASRGL1;BCL11A;BCR;BRSK2;CCSAP;CDH13;CNTN4;CPEB4;CPT1C;CROCC;CYFIP1;DISC1;DLGAP1;DOCK10;ERC1;FBXO31;ITSN1;KCNC1;KCNC4;KCNJ10;KCNN3;KIFAP3;LMTK2;MAG;MAGI2;MBP;MTPN;MYO1D;MYO3B;NCK2;NFASC;NRCAM;NRP1;P2RX1;PDE4B;PDE6B;PRPH2;PRR12;PTPRN2;RAB6B;RAP1A;RGS14;RPS6KB1;RPTOR;SCN10A;SCRIB;SLC2A8;SYN3;SYNJ2;TANC1;TSHZ3;UCN3 |
| GO:0042613 | MHC class II protein complex                 | 0.001    | HLA-DPB1;HLA-DQB1;HLA-DQB2;HLA-DRB1;HLA-DRB5                                                                                                                                                                                                                                                                                                  |
| GO:0033267 | Axon part                                    | 0.001    | ADORA2A;APBB2;BRSK2;CPEB4;CYFIP1;ITSN1;KCNC1;KCNC4;LMTK2;MAG;MBP;MYO1D;NFASC;NRCAM;NRP1;PTPRN2;SYNJ2;TANC1;TSHZ3;UCN3                                                                                                                                                                                                                         |
| GO:0044463 | Cell projection part                         | 0.001    | ADORA2A;AGBL2;APBB2;BRSK2;C2CD5;CATSPER4;CCSAP;CPEB4;CPT1C;CROCC;CYFIP1;DISC1;DNAH9;DOCK10;DUSP22;EPS8L1;FERMT1;ITSN1;KANK1;KCNC1;KCNC4;KIFAP3;LMTK2;MAG;MAGI2;MBP;MYO1D;MYO3B;NDRG4;NEDD1;NFASC;NRCAM;NRP1;PDE4B;PDE6B;PKD1L1;PLB1;PRPH2;PTH1R;PTPRN2;RGS14;RPTOR;SYNJ2;TANC1;TSHZ3;UCN3;WDR66                                               |
| GO:0120038 | Plasma membrane bounded cell projection part | 0.001    | ADORA2A;AGBL2;APBB2;BRSK2;C2CD5;CATSPER4;CCSAP;CPEB4;CPT1C;CROCC;CYFIP1;DISC1;DNAH9;DOCK10;DUSP22;EPS8L1;FERMT1;ITSN1;KANK1;KCNC1;KCNC4;KIFAP3;LMTK2;MAG;MAGI2;MBP;MYO1D;MYO3B;NDRG4;NEDD1;NFASC;NRCAM;NRP1;PDE4B;PDE6B;PKD1L1;PLB1;PRPH2;PTH1R;PTPRN2;                                                                                       |

|                                 |                                           |            |                                                                                                                                                     |
|---------------------------------|-------------------------------------------|------------|-----------------------------------------------------------------------------------------------------------------------------------------------------|
|                                 |                                           |            | RGS14;RPTOR;SYNJ2;TANC1;TSHZ3;UCN3;WDR66                                                                                                            |
| GO:0044304                      | Main axon                                 | 0.003      | ADORA2A;KCNC1;MAG;MBP;MYO1D;NFASC;NRCAM;UCN3                                                                                                        |
| GO:0042611                      | MHC protein complex                       | 0.003      | HLA-DPB1;HLA-DQB1;HLA-DQB2;HLA-DRB1;HLA-DRB5                                                                                                        |
| GO:0030424                      | Axon                                      | 0.004      | ADORA2A;APBB2;BRSK2;CCSAP;CNTN4;CPEB4;CPT1C;CYFIP1;ITSN1;KCNC1;KCNC4;LMTK2;MAG;MBP;MTPN;MYO1D;NFASC;NRCAM;NRP1;PTPRN2;SCN10A;SYNJ2;TANC1;TSHZ3;UCN3 |
|                                 |                                           |            |                                                                                                                                                     |
| <b>PATHWAY:<br/>KEGG number</b> | <b>Description</b>                        | <b>FDR</b> | <b>Gene Symbol</b>                                                                                                                                  |
| hsa04514                        | Cell adhesion molecules (CAMs)            | 0.001      | CDH4;HLA-A;HLA-C;HLA-DPB1;HLA-DQB1;HLA-DRB1;HLA-DRB5;ITGB2;MAG;NFASC;NRCAM;NRXN3;SELL                                                               |
| hsa04940                        | Type I diabetes mellitus                  | 0.002      | HLA-A;HLA-C;HLA-DPB1;HLA-DQB1;HLA-DRB1;HLA-DRB5;PTPRN2                                                                                              |
| hsa05330                        | Allograft rejection                       | 0.008      | HLA-A;HLA-C;HLA-DPB1;HLA-DQB1;HLA-DRB1;HLA-DRB5                                                                                                     |
| hsa05332                        | Graft-versus-host disease                 | 0.008      | HLA-A;HLA-C;HLA-DPB1;HLA-DQB1;HLA-DRB1;HLA-DRB5                                                                                                     |
| hsa05416                        | Viral myocarditis                         | 0.008      | HLA-A;HLA-C;HLA-DPB1;HLA-DQB1;HLA-DRB1;HLA-DRB5;ITGB2                                                                                               |
| hsa05310                        | Asthma                                    | 0.016      | HLA-DPB1;HLA-DQB1;HLA-DRB1;HLA-DRB5;PRG2                                                                                                            |
| hsa05320                        | Autoimmune thyroid disease                | 0.024      | HLA-A;HLA-C;HLA-DPB1;HLA-DQB1;HLA-DRB1;HLA-DRB5                                                                                                     |
| hsa05150                        | Staphylococcus aureus infection           | 0.026      | C3;HLA-DPB1;HLA-DQB1;HLA-DRB1;HLA-DRB5;ITGB2                                                                                                        |
| hsa04145                        | Phagosome                                 | 0.026      | C3;COLEC11;COLEC12;HLA-A;HLA-C;HLA-DPB1;HLA-DQB1;HLA-DRB1;HLA-DRB5;ITGB2                                                                            |
| hsa04650                        | Natural killer cell mediated cytotoxicity | 0.031      | HLA-A;HLA-C;IFNAR2;ITGB2;KLRC4-KLRK1;MICA;PPP3R1;SH2D1B;SH3BP2                                                                                      |

GO, Gene Ontology; FDR, false discovery rate; KEGG, Kyoto Encyclopedia of Genes and Genomes.
